# Supplementary material for: PBRM1 directs PBAF to pericentromeres and protects centromere integrity
Source: Springer Nature journal article supplement (doi:10.1038/s41467-025-57277-9), 2025-02-26
Supplement: MOESM1 [file 41467_2025_57277_MOESM1_ESM.pdf]

# **PBRM1 directs PBAF to pericentromeres and protects centromere integrity**

Karen A. Lane<sup>\*</sup>, Alison Harrod<sup>\*</sup>, Lillian Wu, Theodoros I. Roumeliotis, Hugang Feng, Shane Foo, Katheryn A. G. Begg, Federica Schiavoni, Noa Amin, Frank T. Zenke, Alan A. Melcher, Jyoti S. Choudhary, and Jessica A. Downs

## **Supplementary information & figures**



**Figure S1**

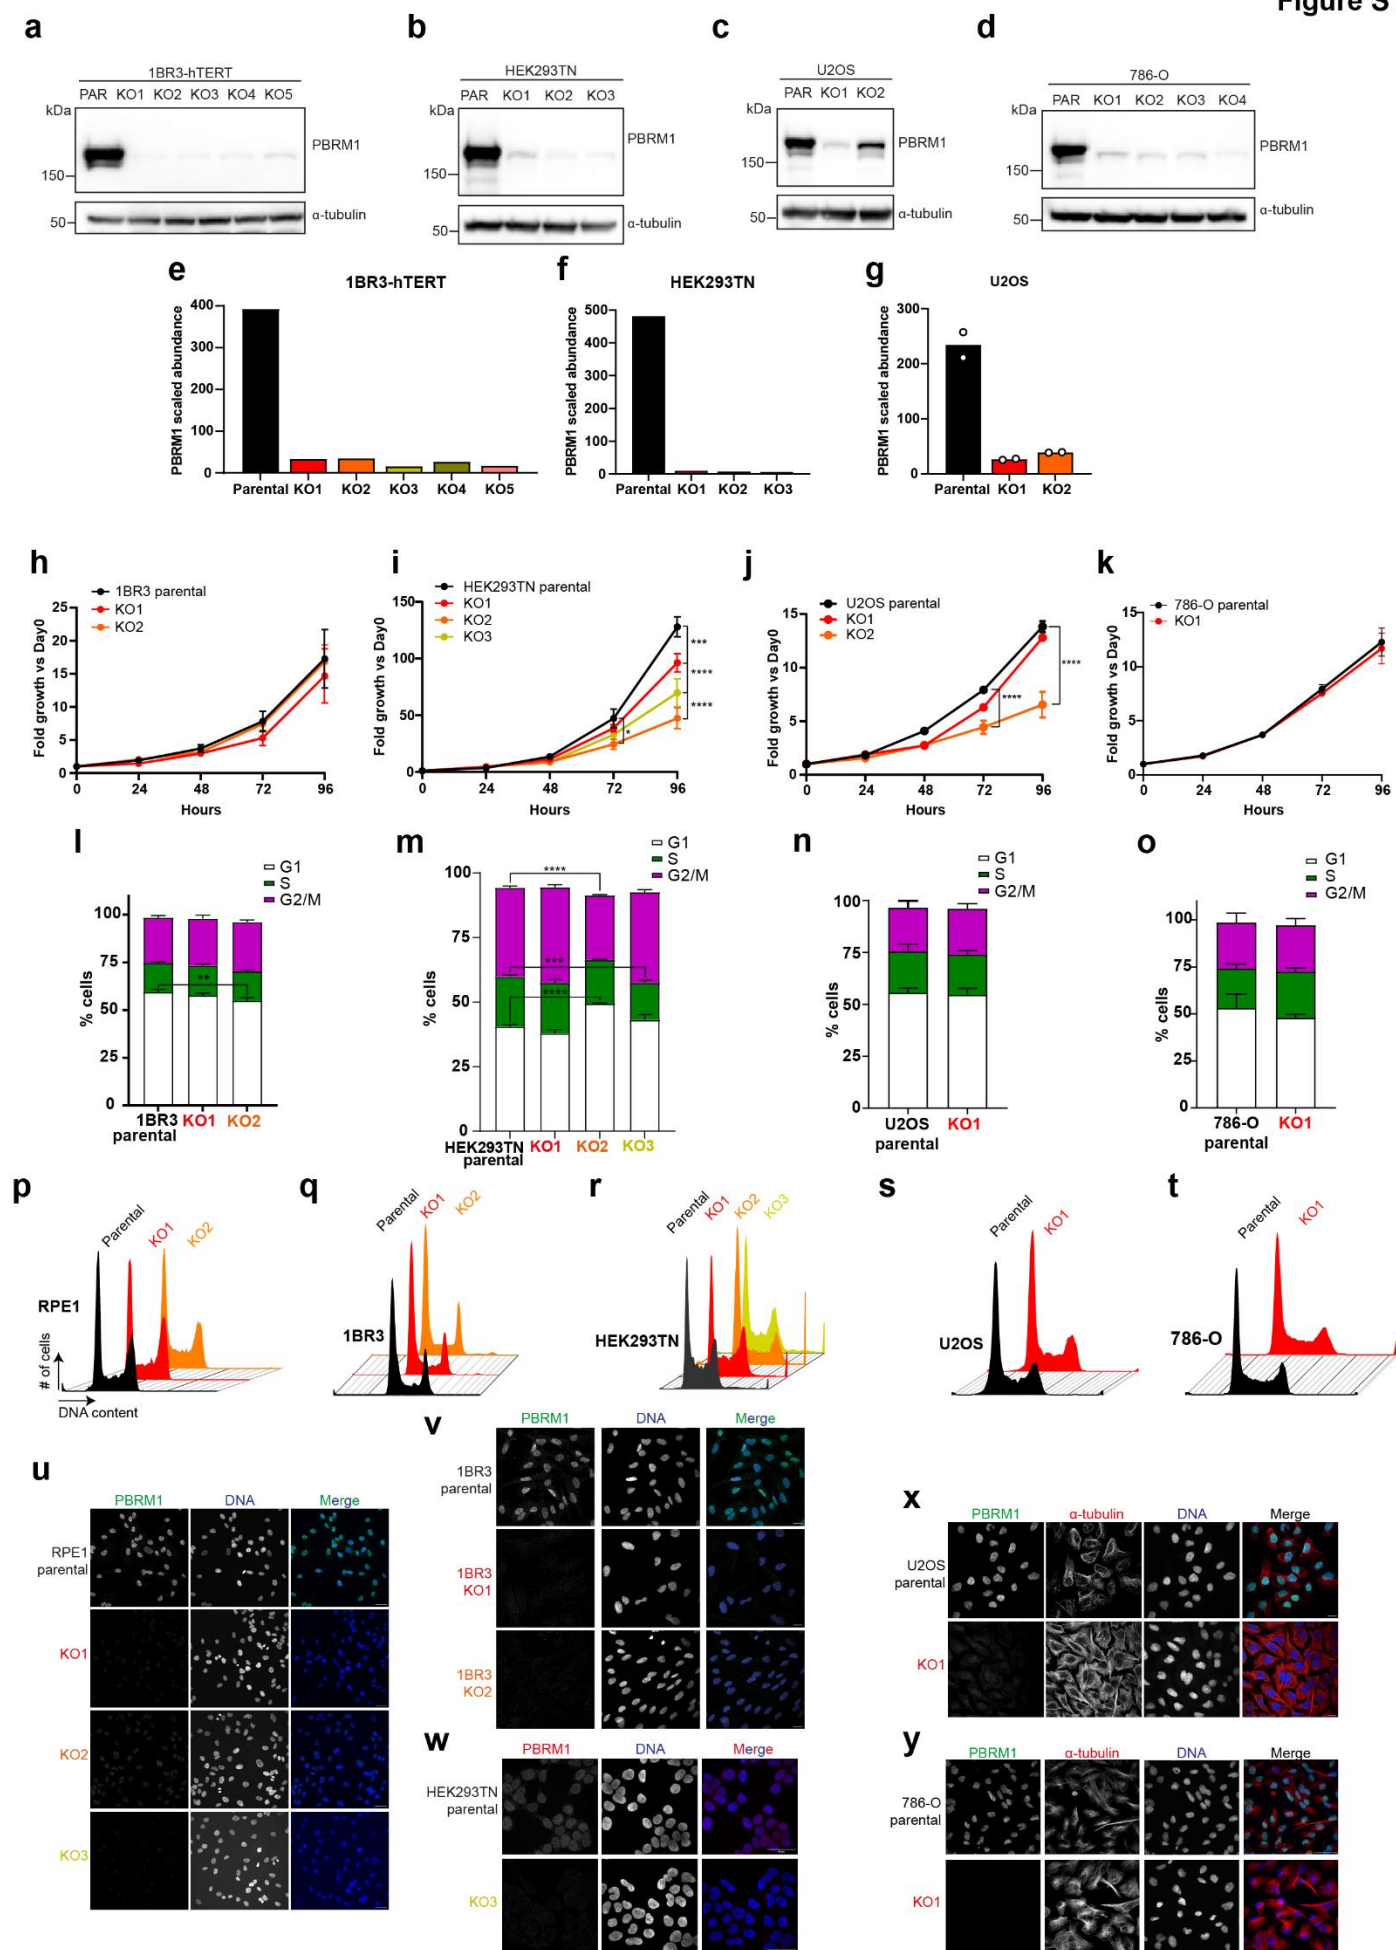



**Supplementary Figure 1. Characterisation of PBRM1 KO cell lines.** **a-d** Western blotting for PBRM1 in parental and PBRM1 knockouts of the indicated cell lines – (a) 1BR3-hTERT, (b) HEK293TN, (c) U2OS, and (d) 786-O. Note that one clone in U2OS (“HetKO2”) retains low levels of PBRM1 due to a heterozygous truncating mutation.  $\alpha$ -tubulin was used as loading control. **e-g** Scaled abundances of PBRM1 in proteomic analyses of whole cell protein extracts of parental and PBRM1 knockouts in (e) 1BR3-hTERT, (f) HEK293TN, and (g) U2OS. Points in (g) correspond to two independent biological replicates. PBRM1 was not detected in proteomic analyses of 786-O cells. **h-k** Proliferation rates of PBRM1 knockouts in (h) 1BR3-hTERT ( $n=5$ ), (i) HEK293TN ( $n=3$ ,  $*p=0.0114$ ,  $***p=0.0004$ ,  $****p<0.0001$ ), (j) U2OS ( $n=2$  for KO1,  $n=4$  for KO2,  $****p<0.0001$ ), and (k) 786-O ( $n=3$ ), compared to parental cells. Cells were counted every 24 hours and fold change in cell number was calculated compared to the number of cells seeded. Data are presented as mean $\pm$ SEM and were analysed by 2way ANOVA with Dunnett’s test. **l-o** Cell cycle distribution of parental and PBRM1 knockout cells in (l) 1BR3-hTERT ( $n=4$ ,  $**p=0.0038$ ), (m) HEK293TN ( $n=3$ ,  $***p=0.0005$ ,  $****p<0.0001$ ), (n) U2OS ( $n=4$ ), and (o) 786-O ( $n=4$ ), measured using flow cytometry. Data are presented as mean $\pm$ SEM and were analysed by 2way ANOVA with Dunnett’s test. **p-t** Representative histograms showing cell cycle profiles of parental and PBRM1 knockout (p) hTERT-RPE1, (q) 1BR3-hTERT, (r) HEK293TN, (s) U2OS, and (t) 786-O cells, corresponding to data shown in Figure 1(e) and Supplementary Figure 1(l)-(o). **u-y** Representative immunofluorescence images showing PBRM1 expression in parental and PBRM1 knockout cells in (u) hTERT-RPE1, (v) 1BR3-hTERT, (w) HEK293TN, (x) U2OS, and (y) 786-O, as well as nuclear (DNA, blue) staining. **x & y** also show cytoskeleton ( $\alpha$ -tubulin, red) staining. Scale bars correspond to 20 $\mu$ m in **u**, **v**, & **x**, and correspond to 50  $\mu$ m in **w** and **y**. Source data are provided as a source data file.



Figure S2

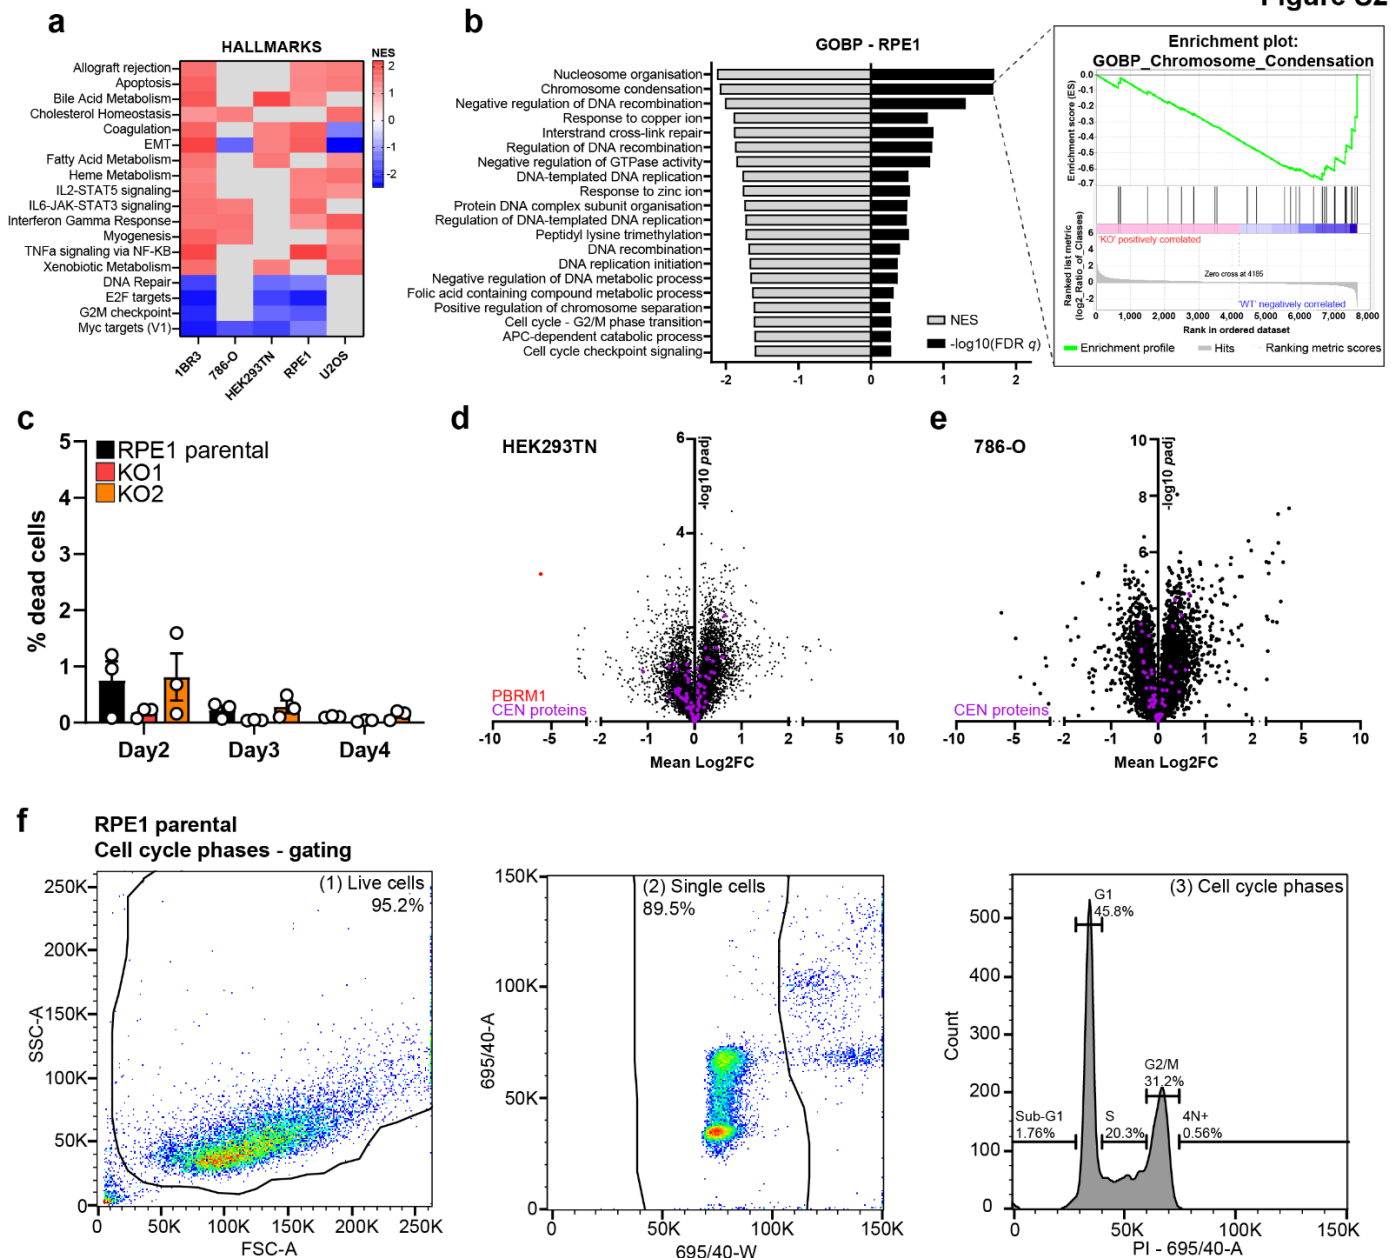

**Supplementary Figure 2. Dysregulation of a number of pathways is conserved across PBRM1 KO cell lines.** **a** Heatmap showing the normalised enrichment score (NES) of Hallmark gene sets associated with PBRM1 loss, determined using GSEA analysis. Red corresponds to positive enrichment in PBRM1 knockouts versus the corresponding parental cells, while blue corresponds to negatively enriched gene sets. Grey cells indicate gene sets which did not reach a significant enrichment level of  $\text{FDR} < 0.25$ . Only Hallmark gene sets significantly enriched in 3 or more cell lines were included on heatmap. **b** GSEA gene ontology analysis of biological processes (GOBP) negatively enriched in RPE1 PBRM1 knockouts compared to parental cells. The 20 processes with the most significant FDR  $q$  values were included. NES (grey bars) of these enriched biological processes, as well as the  $-\log_{10}$  FDR  $q$ -value (black bars) is shown. A representative enrichment plot of one of these biological processes, 'Chromosome Condensation', is shown on the right. **c** Quantification of the % of dead cells, defined as the % of propidium-iodide positive cells in a cell population, over the course of 4 days in culture, in RPE1 parental and PBRM1 knockouts.  $n=3$ , mean $\pm$ SEM, with points indicating independent biological replicates, and data were analysed by 2way ANOVA with Dunnett's test. **d-e** Protein abundances in PBRM1 knockouts compared to parental cells in (d) HEK293TN and (e) 786-O cell lines, detected using LC-MS of whole cell protein extracts. The mean Log2FC of protein abundance in PBRM1 knockouts versus parental cells is plotted against the  $-\log_{10} p$ . PBRM1 is highlighted in red, while peri/centromeric proteins are highlighted in purple. **f** Representative gating strategy for cell cycle analysis using flow cytometry in Figure 1 and Supplementary Figure 1. Cells were gated for live cells (left), single cells (centre), and remaining PI-stained cells were profiled for DNA content and assigned to the indicated cell cycle stages (right). Source data are provided as a source data file.



Figure S3

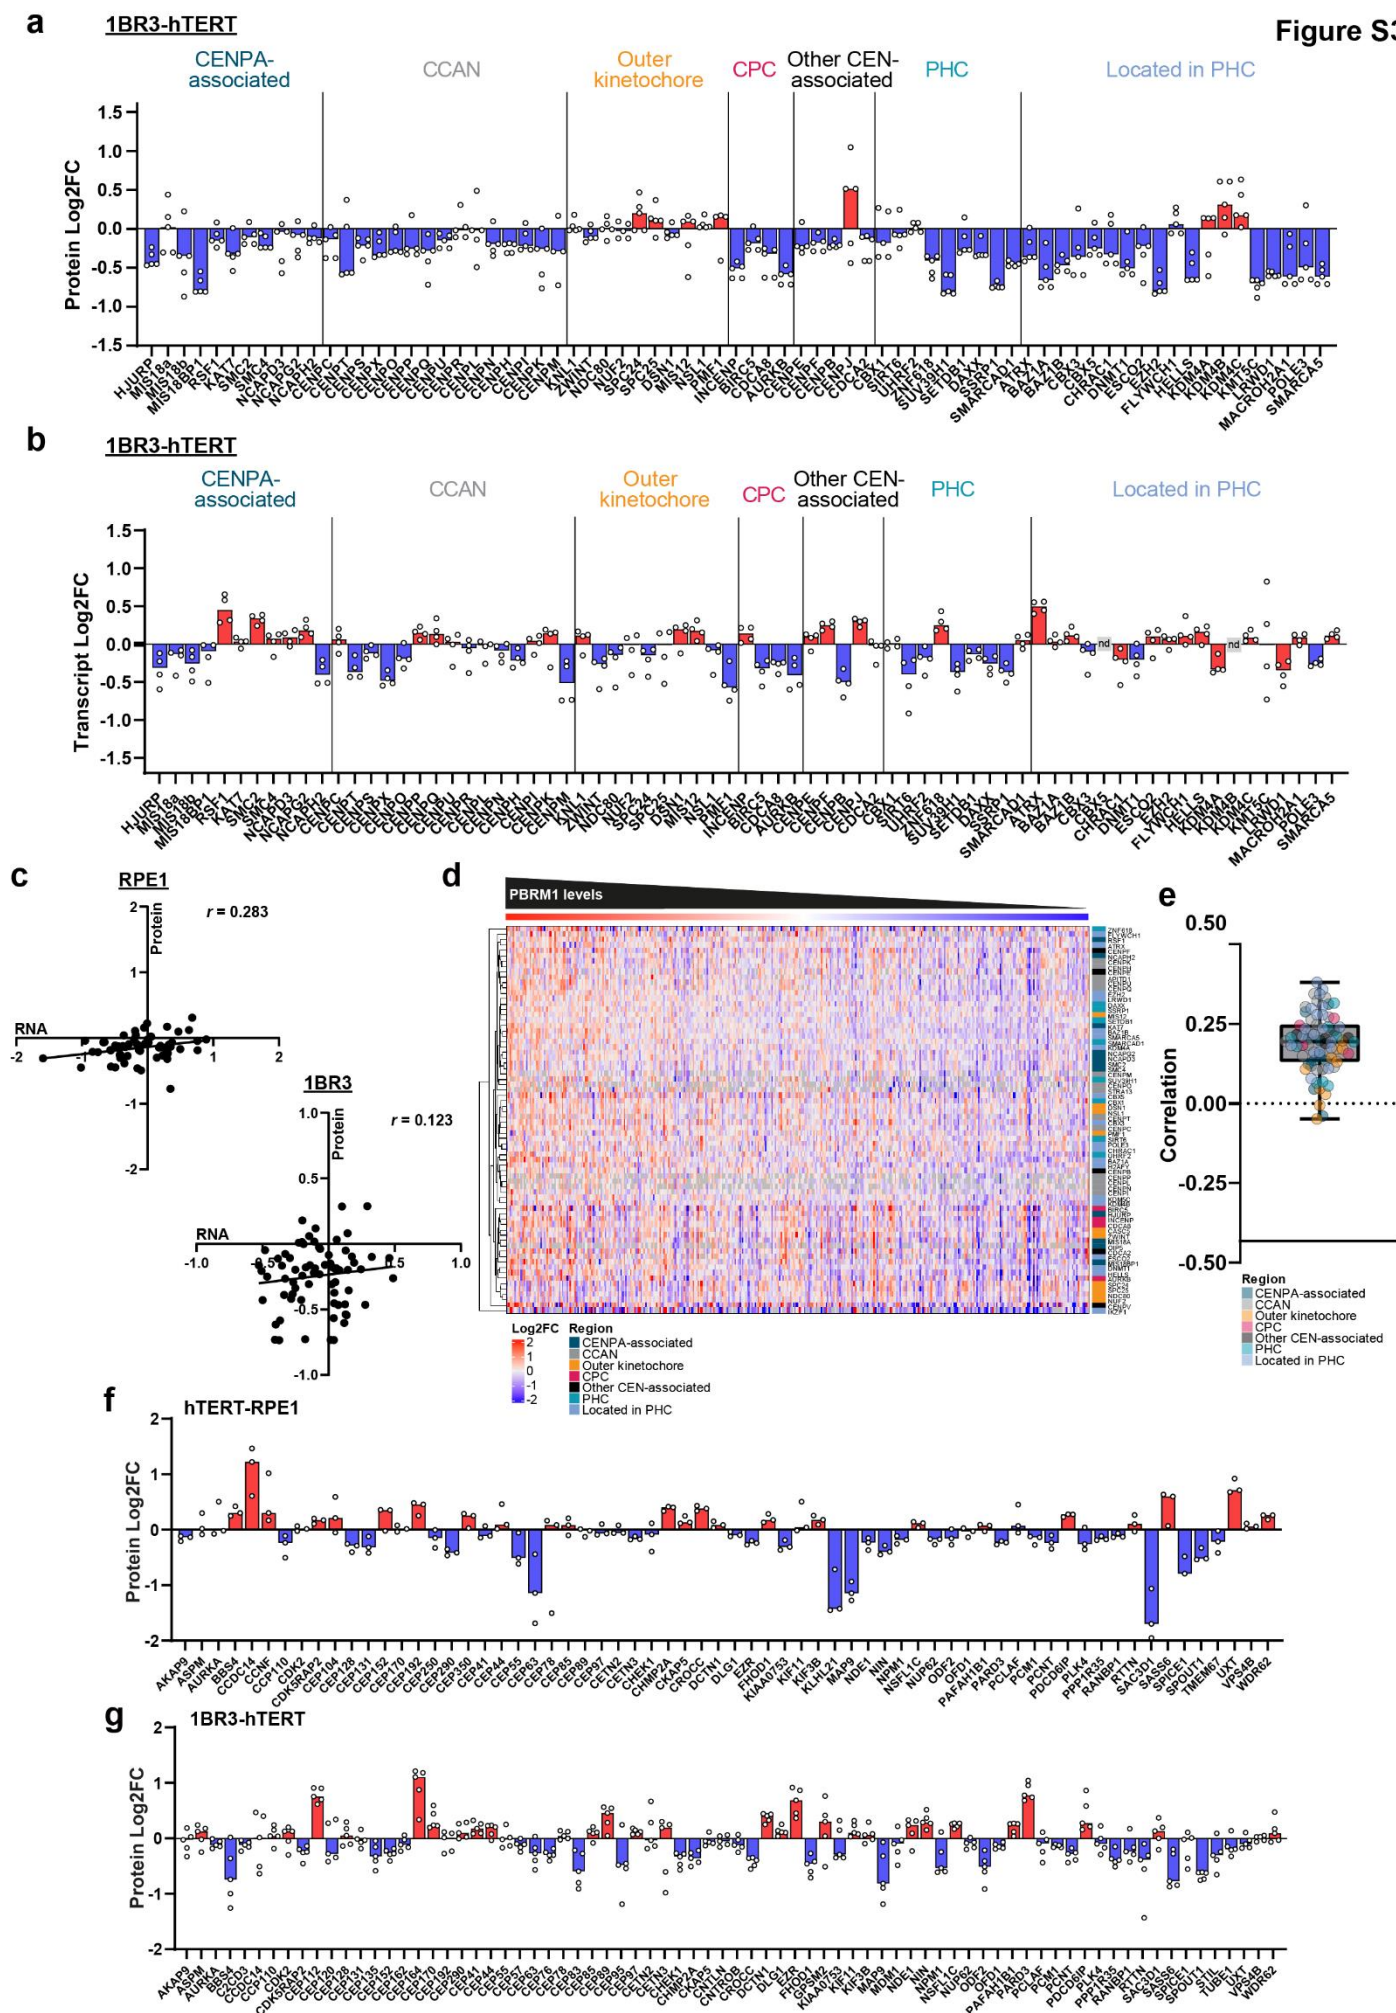



**Supplementary Figure 3. PBRM1 KO cells show a loss of centromere proteins.** **a** Log2FC of annotated centromere- and pericentromere-associated proteins in 1BR3 PBRM1 knockouts compared to parental cells. Points correspond to independent knockout clones. **b** Transcript levels of annotated centromere- & pericentromere-associated genes corresponding to the proteins in **a** were detected using RNA-seq. Median Log2FC of annotated genes transcribing centromere- & pericentromere-associated proteins in 1BR3 PBRM1 knockouts was plotted compared to parental cells. Points correspond to two individual knockout clones (KO1 and KO2) and two independent biological replicates. **c** Correlation plot showing Pearson correlation between protein and RNA levels of centromere & pericentromere protein/gene Log2FCs, in RPE1 (left) and 1BR3 (right) PBRM1 KOs compared to parental cells. Line indicates simple linear regression and Pearson correlation coefficient ( $r$ ) is displayed. **d** Log2 fold changes of the indicated peri/centromere proteins in cancer cell lines from the CCLE database. Heatmap is ordered from highest to lowest PBRM1 Log2FC, left to right. **e** Pearson correlation of abundances of each protein in **d** versus PBRM1 abundance in cell lines from the CCLE database. Boxes contain the 25th to 75th percentiles with a line at median, and whiskers extend to the 10th and 90th percentiles, and individual points represent each protein from the indicated centromeric & pericentromeric regions. **f-g** Log2FC of annotated centrosome component and associated proteins in PBRM1 knockouts in (f) RPE1 and (g) 1BR3 cells compared to the parental of each cell line. Individual points represent independent PBRM1 knockout clones. Source data are provided as a source data file.



Figure S4

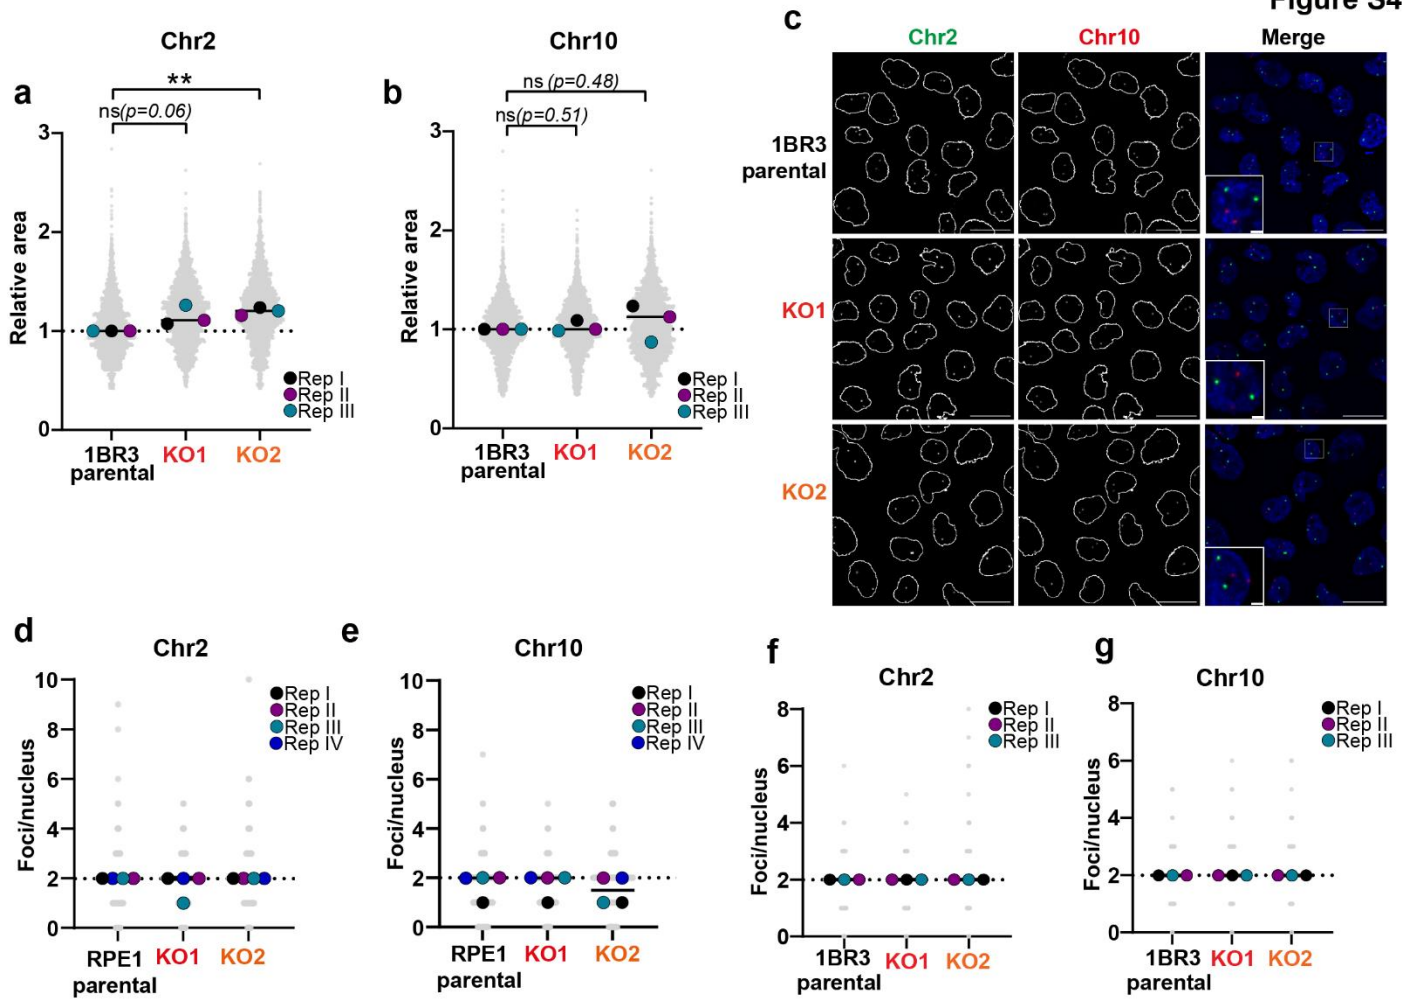

**Supplementary Figure 4. PBRM1 knockouts have mildly increased  $\alpha$ -satellite area.** **a-b** Quantification of the area of individual foci in 1BR3 parental or PBRM1 knockout cells stained for  $\alpha$ -satellite centromeric regions in (a) chromosome 2 and (b) chromosome 10, using FISH probes against  $\alpha$ -satellite sequences in the corresponding chromosomes.  $n=3$ , grey points indicate individual foci, and coloured points represent the median of independent biological replicates, with line at the median of these replicates. Data were normalised to median area of parental cells and significance was determined using a two-sided t-test,  $**p=0.0061$ . **c** Representative images of  $\alpha$ -satellite FISH of chromosomes 2 and 10 in 1BR3 parental and PBRM1 knockouts. Scale bars correspond to 20 $\mu$ m; in zoomed inset images, scale bars correspond to 5 $\mu$ m. **d-e** Quantification of the number of foci in RPE1 parental or PBRM1 knockout cells stained for  $\alpha$ -satellite centromeric regions in (d) chromosome 2 and (e) chromosome 10, using FISH probes against  $\alpha$ -satellite sequences in the corresponding chromosomes.  $n=3$ , grey points indicate individual foci, and coloured points represent the median of independent biological replicates, with line at the median of these replicates. **f-g** Quantification of the number of foci in 1BR3 parental or PBRM1 knockout cells stained for  $\alpha$ -satellite centromeric regions in (f) chromosome 2 and (g) chromosome 10, using FISH probes against  $\alpha$ -satellite sequences in the corresponding chromosomes.  $n=3$ , grey points indicate individual foci, and coloured points represent the median of independent biological replicates, with line at the median of these replicates. For RPE1, at least 1,000 foci were analysed per cell line. Source data are provided as a source data file.



Figure S5

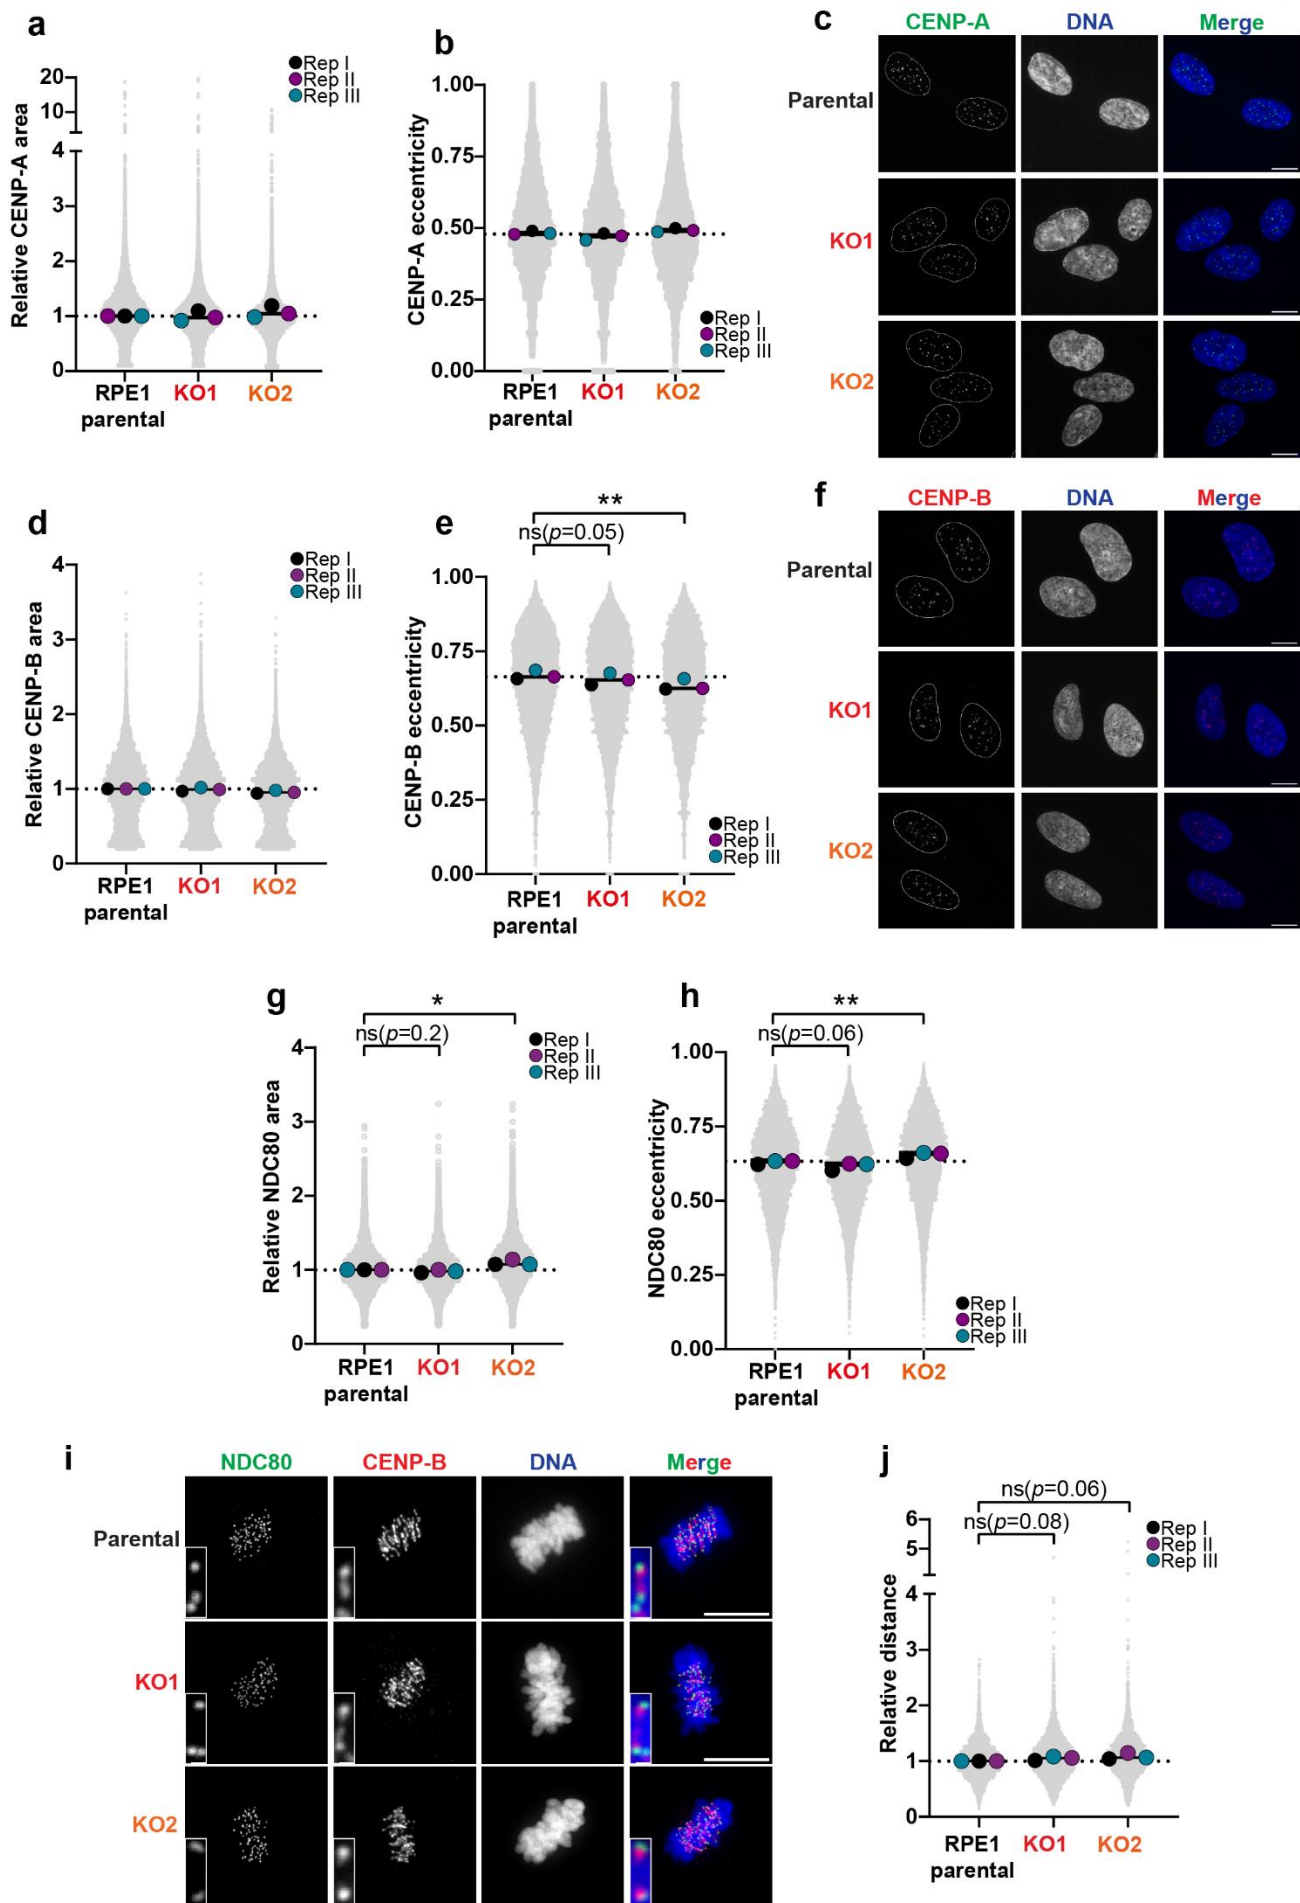



**Supplementary Figure 5. PBRM1 knockouts show altered structure of centromere-associated proteins. a-b** Quantification of the (a) area and (b) shape (eccentricity) of CENP-A foci in RPE1 parental and PBRM1 KO cells.  $n=3$ , grey points indicate individual foci, and coloured points represent the median of independent biological replicates, with line at the median of these replicates. Data were normalised to median area of parental cells and differences were not significant based on a two-sided t-test. At least 300 cells were analysed for each condition. **c** Representative images showing CENP-A foci (green) in RPE1 parental and PBRM1 knockout cells. Scale bars correspond to 10 $\mu$ m. **d-e** Quantification of the (d) area and (e) shape (eccentricity) of CENP-B foci in RPE1 parental and PBRM1 KO cells.  $n=3$ , grey points indicate individual foci, and coloured points represent the median of independent biological replicates, with line at the median of these replicates. Data were normalised to median area of parental cells and were analysed using two-sided t-test,  $**p=0.0074$ . At least 150 cells were analysed for each condition. **f** Representative images showing CENP-B foci (red) in RPE1 parental and PBRM1 knockout cells. Scale bars correspond to 10 $\mu$ m. **g-h** Quantification of the (g) area and (h) shape (eccentricity) of NDC80 foci in RPE1 parental and PBRM1 KO cells in metaphase.  $n=3$ , grey points indicate individual foci, and coloured points represent the median of independent biological replicates, with line at the median of these replicates. Data were normalised to median area of parental cells and analysed using two-sided t-test,  $*p=0.0486$ ,  $**p=0.0058$ . At least 95 metaphases were analysed for each condition. **i** Representative images showing NDC80 (green) and CENP-B (red) in RPE1 parental and PBRM1 knockout cells. Scale bars correspond to 10 $\mu$ m. In zoomed images, scale bars correspond to 0.5 $\mu$ m. **j** Quantification of the distance between sister centromeres in dividing RPE1 parental and PBRM1 knockout cells, measured as the distance ( $\mu$ m) between NDC80 foci in metaphase nuclei. Sister kinetochores were identified via the connecting CENP-B signal between NDC80 foci.  $n=3$ , grey points indicate individual foci, and coloured points represent the median of independent biological replicates, with line at the median of these replicates. Data were normalised to median area of parental cells and analysed using two-sided t-test. Source data are provided as a source data file.



## 1. Identify centromere & pericentromere reads

Extract SMARCA4 & PBRM1 CUT&RUN reads which map to centromere/pericentromere

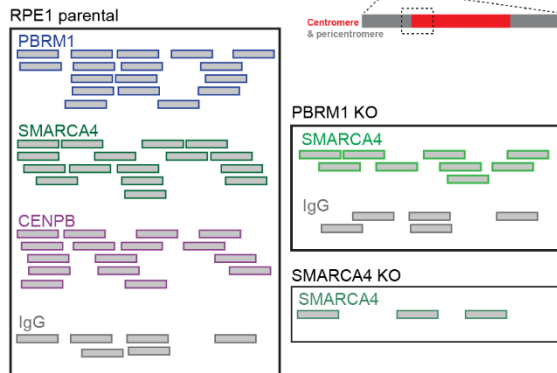

Extract ChIP-seq reads of histone marks which map to centromere/pericentromere (from Van Rechtem et al., 2021)

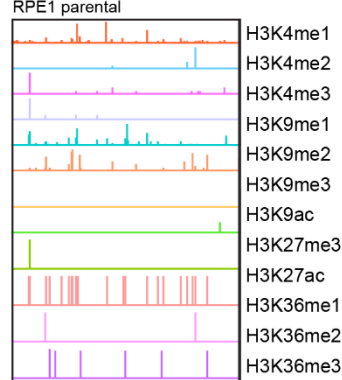

Extract H3K9me2/me3 CUT&RUN reads which map to centromere/pericentromere

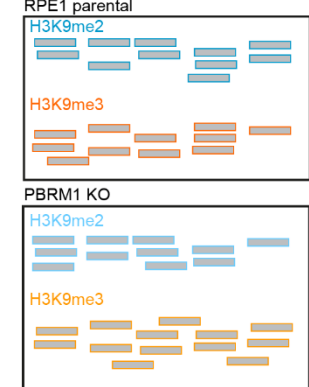

## 2. Unique reads: peak analysis

Filter to remove multimapping reads

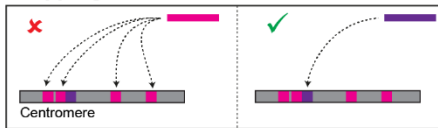

Call peaks against IgG/input control

Figures 3(b), 3(e), S7(a), S7(e), S8(c), 5(b), S11(b)

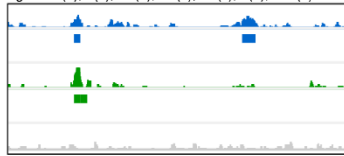

Analysis of peak results

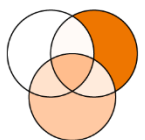

Compare peak patterns between samples

Figures 3(c), S7(c), S7(f)  
Figures 4(a), S8(a), S8(d)  
Figures 5(a), S11(a)

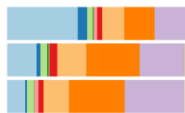

Compare distribution in annotated genome regions

Figures 3(d), S7(d), 4(e), S8(b)

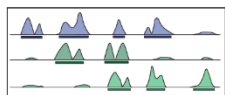

Identify & compare subsets with distinct binding patterns

Figures 4(b), 4(c), 4(d), S9(a), S9(b), S9(c)

## 3. Multimapping reads: k-mer analysis

Count 51-mer sequences & normalise across replicates

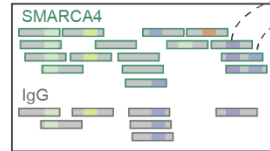

CAATTGCAGATTCCACAAAA...<sub>51</sub>  
TTGCAGATTCCACAAAAAGAG...<sub>51</sub>

$$\text{Normalised read count} = \frac{\text{\# of times k-mer detected}}{\text{total \# of bases in replicate}}$$

Detect enriched k-mers

Figures S8(e)

Enriched k-mers:

- Normalised k-mer count > 5E-09
- Fold change > 2
- vs average IgG/input normalised count
- Fold change > 2 in at least 2 replicates

Conditions used to calculate enriched k-mers

| Target        | Cell line     | Control |
|---------------|---------------|---------|
| PBRM1         | RPE1 parental | IgG     |
| SMARCA4       | RPE1 parental | IgG     |
| SMARCA4       | PBRM1 KO      | IgG     |
| SMARCA4       | SMARCA4 KO    | IgG     |
| CENPB         | RPE1 parental | IgG     |
| Histone marks | RPE1 parental | Input   |
| H3K9me2       | RPE1 parental | IgG     |
| H3K9me3       | RPE1 parental | IgG     |
| H3K9me2       | PBRM1 KO      | IgG     |
| H3K9me3       | PBRM1 KO      | IgG     |

Map enriched k-mers back to genome

Figures 3(f), S7(g)  
Figures 5(d), S11(c), S11(d), S11(e)

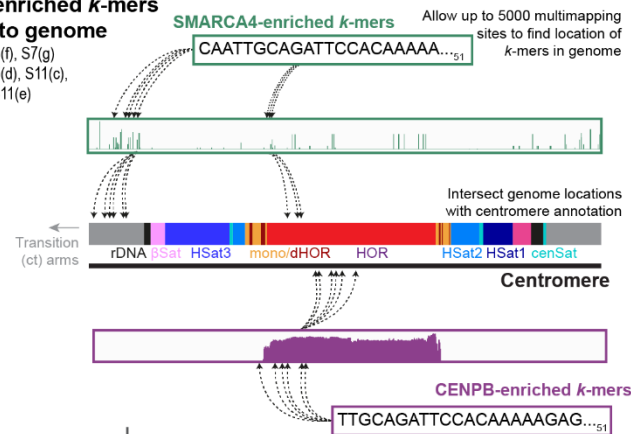

Analysis of k-mer results

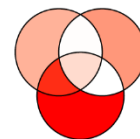

Compare enriched k-mers between samples & subsets

Figures 3(g), S7(i), 4(a), S8(f), S9(c),  
Figures S10(a), 10(b), S10(c), S10(d), 5(c)

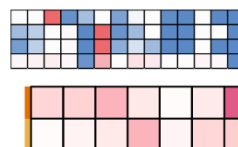

Calculate proportion of k-mer mapping locations in each centromeric region

Figures 3(i), S7(h), S8(g), S8(h), S9(d), S9(e),  
Figures 5(e), S11(f), S11(g), S11(h)



**Supplementary Figure 6. Detailed workflow for the mapping strategy of CUT&RUN and ChIP-seq reads to centromeric and pericentromeric sequences.** Workflow for mapping SWI/SNF subunits, CENP-B, and H3K9me2/3 CUT&RUN and publicly available ChIP-seq reads to centromeric and pericentromeric sequences (Box 1), either by calling peaks only on uniquely mapping reads (Box 2), or by taking all reads that mapped to the centromere and pericentromere, including multimapping reads at repetitive sequences, using *k*-mer enrichment analysis (Box 3). Detailed steps are described in Methods. Briefly, enriched peaks of uniquely mapping reads were compared between conditions and distribution of peaks among features was determined. For enriched *k*-mer analysis, sequencing reads which mapped to the centromeric and pericentromeric regions were extracted and 51-mer sequences in these reads were counted, normalised and compared across samples. Enriched *k*-mers were compared between conditions and were also mapped back to the genome and intersected with centromere annotation to determine where enriched *k*-mers are located. Data corresponding to these analyses are presented in Figures 3, 4 and 5, and Supplementary Figures 7-11, as indicated beside each stage of the analysis workflow.



Figure S7

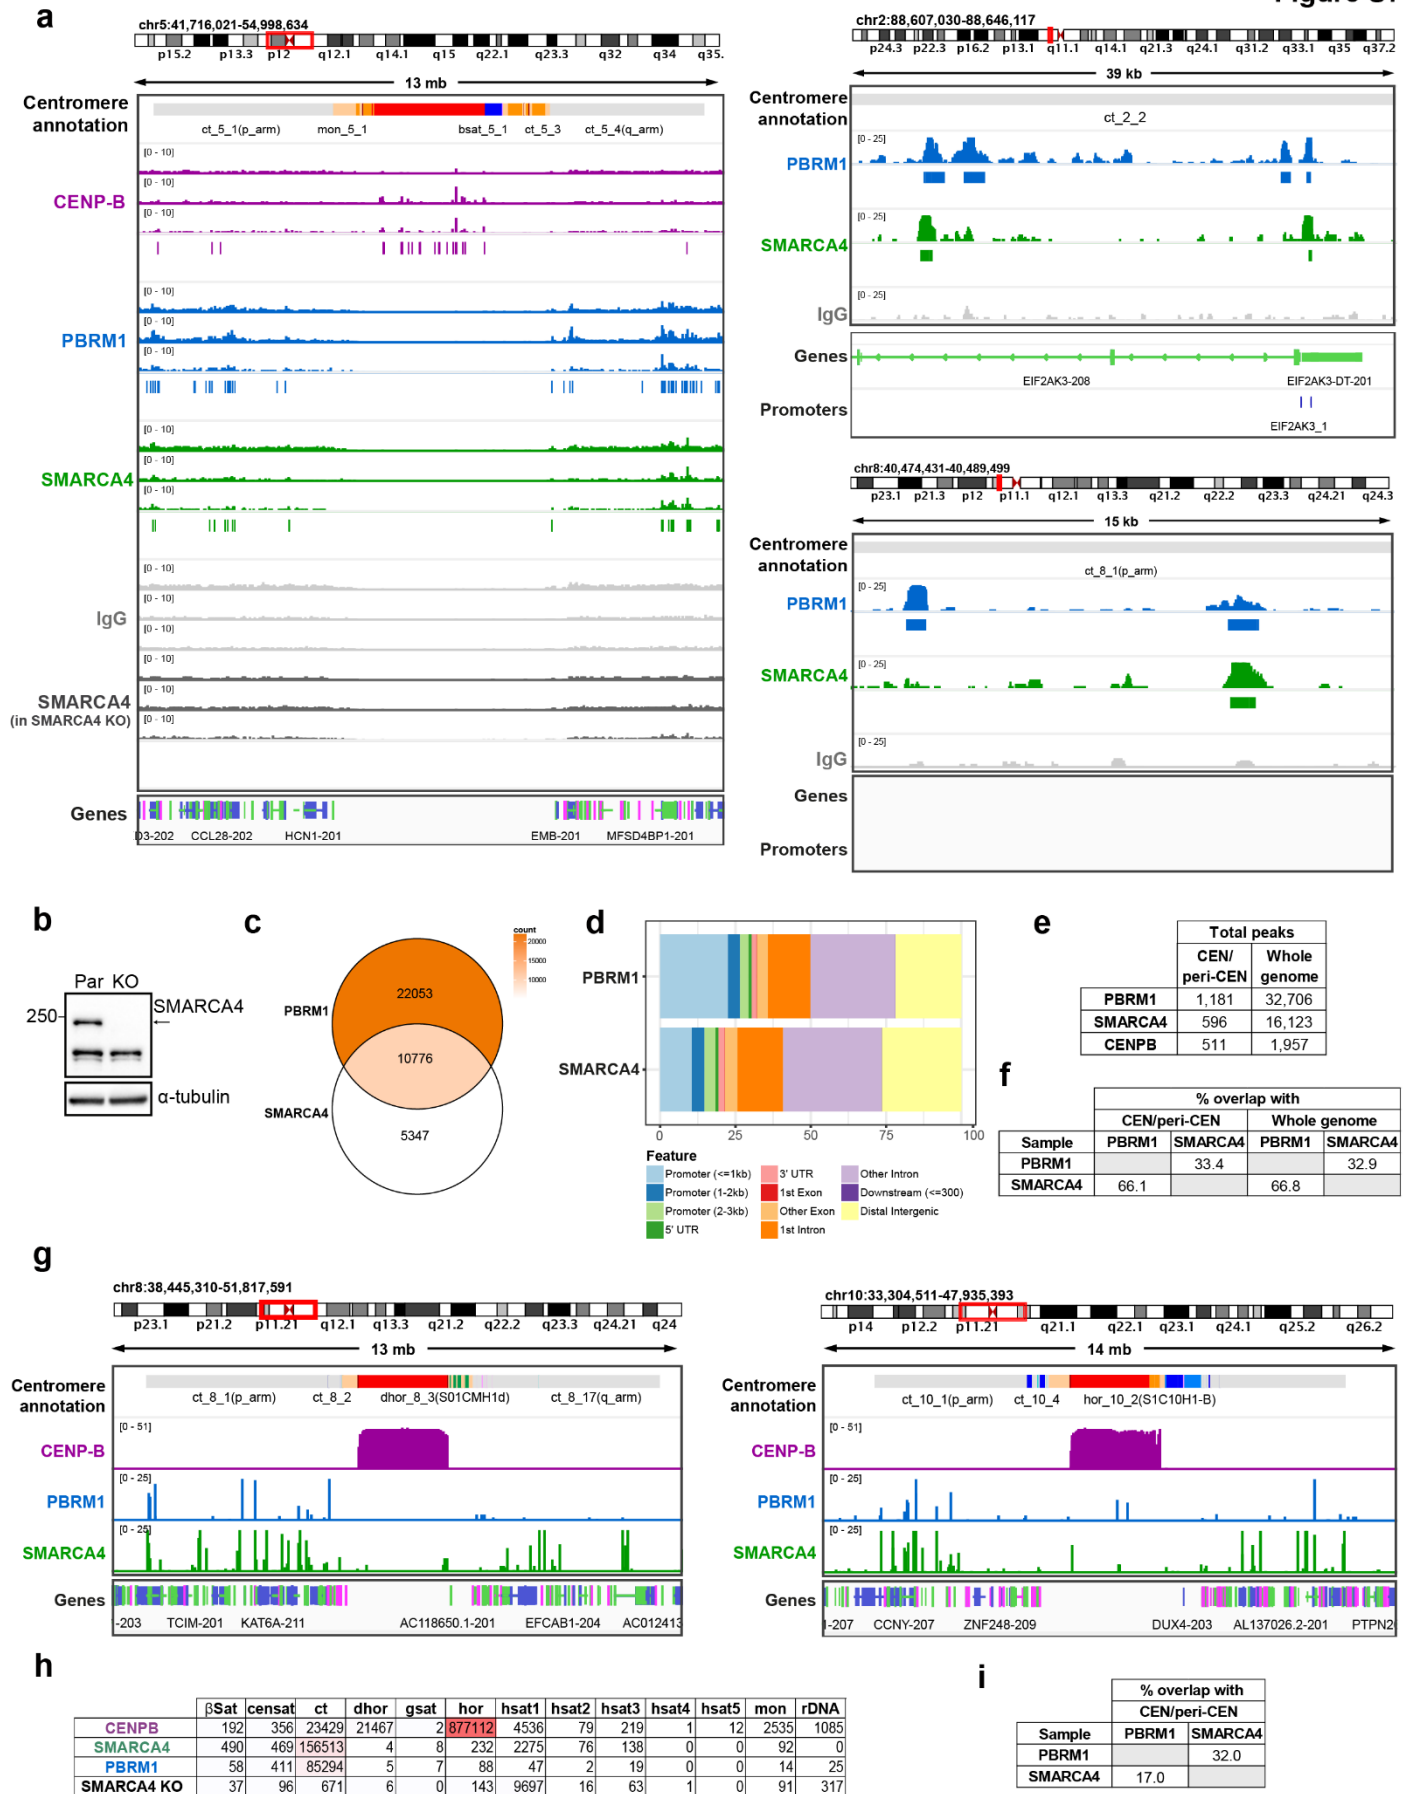



**Supplementary Figure 7. SWI/SNF binding in centromeric and pericentromeric regions.** **a** Additional examples of representative genome tracks displaying coverage of reads from CENP-B (purple), PBRM1 (blue), SMARCA4 (green) and IgG control (grey) CUT&RUN sequencing in RPE1 parental cells, and SMARCA4 in SMARCA4 KO RPE1 cells as an additional control (dark grey). The full centromere is shown (left), and two examples of a zoomed in view of the centromere transition (ct) arms (right), excluding the CENP-B track. **b** Western blotting for SMARCA4 expression in whole cell lysates from RPE1 parental and SMARCA4 knockout cells used in CUT&RUN experiments.  $\alpha$ -tubulin is used as loading control. **c** Venn diagram indicating the overlap of significantly enriched peaks in the whole genome, in SMARCA4 and PBRM1 in RPE1 parental cells versus their IgG control. Venn diagram shows enriched peaks found in at least two out of the three independent biological replicates, versus their IgG controls. The colour corresponds to the total number of enriched peaks in each region of the Venn diagram (count). **d** Stacked colour bar representing the genomic distribution of enriched PBRM1 and SMARCA4 peaks, categorised by feature, across the whole genome. **e** Table showing the total number of enriched peaks in PBRM1, SMARCA4, and CENP-B CUT&RUN sequencing in RPE1 parental cells, both in the centromere and pericentromere ('CEN/peri-CEN') and in the whole genome. **f** Table with percentage overlaps of peaks from the Venn diagrams in Figure 3c and Supplementary Figure 7c, showing shared peaks in the centromere/pericentromere and whole genome. **g** Additional representative genome tracks displaying mapping locations of enriched *k*-mers across the centromere and pericentromere from analysis of CENP-B (purple), PBRM1 (blue) and SMARCA4 (green) CUT&RUN sequencing in RPE1 parental cells). Genomic location is indicated at the top. Centromeric region is indicated above the tracks and transcript annotation is shown below the tracks. **h** Numbers of enriched *k*-mers which could map to the indicated region of the centromere and pericentromere in each dataset. **i** Table with percentage overlaps of *k*-mers from the Venn diagram in Figure 3g. Source data are provided as a source data file.



Figure S8

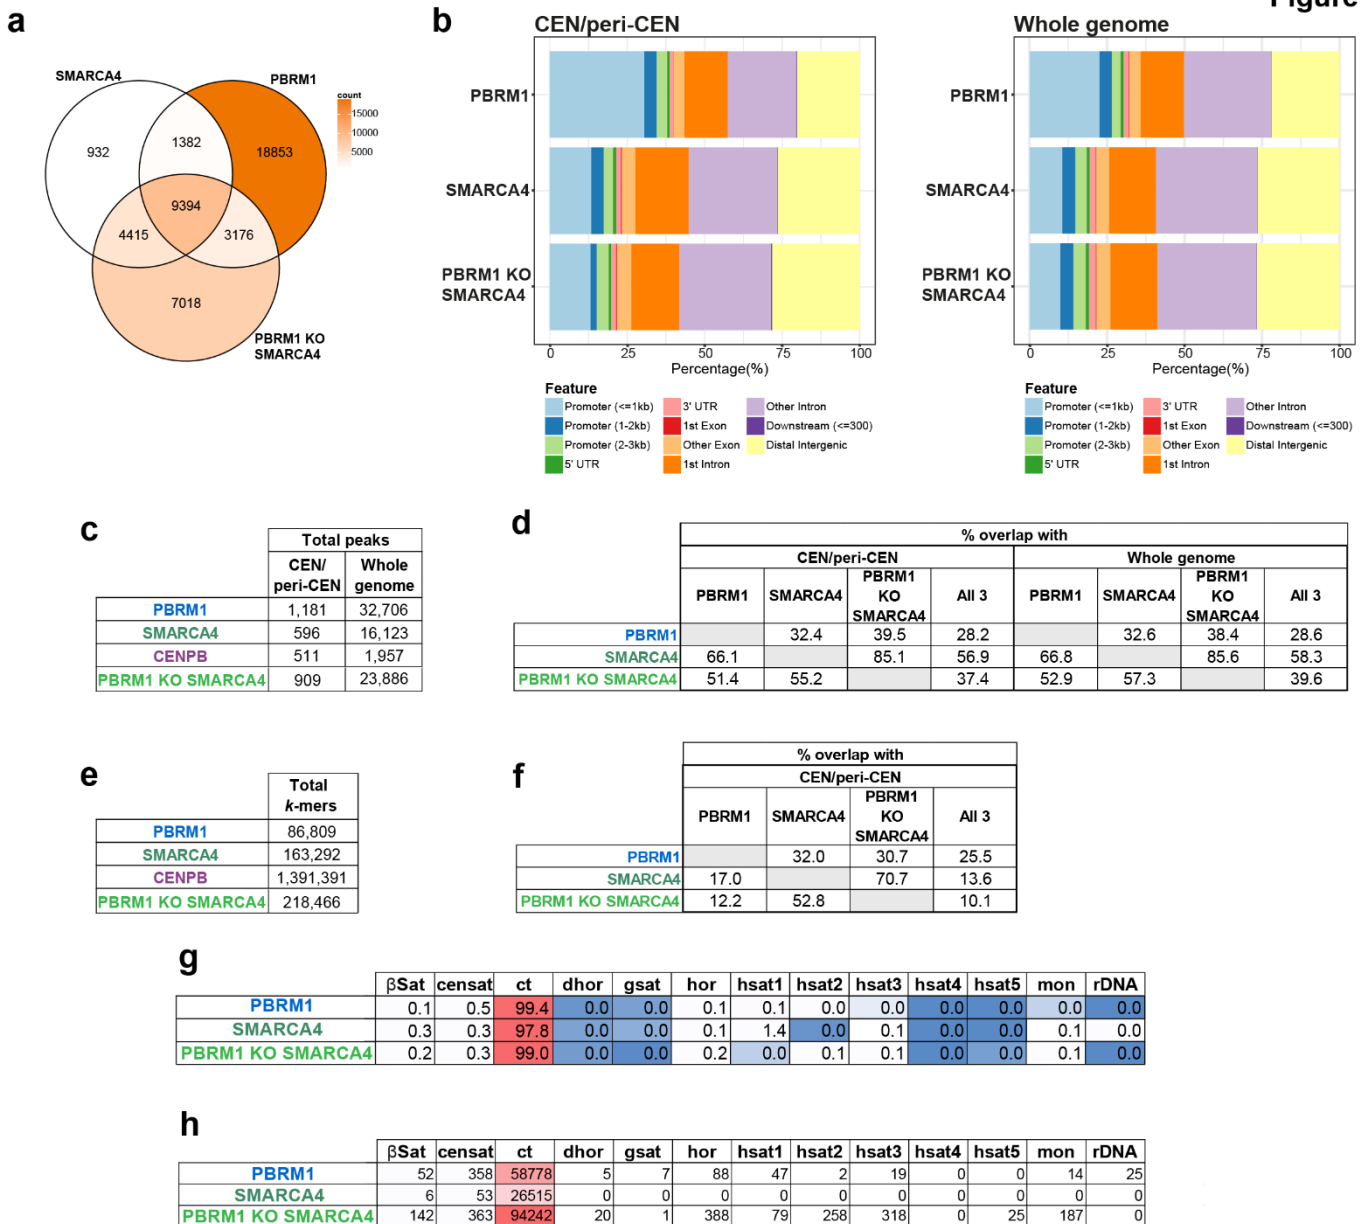

**Supplementary Figure 8. SWI/SNF binding in PBRM1 KO cells is altered.** **a** Venn diagram indicating the overlap of significantly enriched peaks across the whole genome, in SMARCA4 and PBRM1 in RPE1 parental cells (as per Supplementary Figure 7c), and SMARCA4 in PBRM1 KO cells. Venn diagrams shows enriched peaks found in at least two out of the three independent biological replicates, versus their IgG controls. The colour corresponds to the total number of enriched peaks in each region of the Venn diagram (count). **b** Stacked colour bars representing the genomic distribution of enriched PBRM1 and SMARCA4 peaks in RPE1 parental cells (as per Figure 3d and Supplementary Figure 7d) and SMARCA4 peaks in PBRM1 knockout cells, categorised by feature, in the centromere and pericentromere (left) and across the whole genome (right). **c** Table showing the total number of enriched PBRM1, SMARCA4, and CENP-B peaks in RPE1 parental cells (as per Supplementary Figure 7e), plus SMARCA4 peaks in PBRM1 KO cells, both in the centromere and pericentromere, and in the whole genome. **d** Table showing the % overlap of peaks called in PBRM1 and SMARCA4 CUT&RUN sequencing in RPE1 parental cells (as per Supplementary Figure 7f) as well as with SMARCA4 peaks enriched in PBRM1 KO cells, with "All 3" referring to the overlap of peaks in all 3 datasets. Overlapping peaks were calculated using bedtools intersect package, compared to the Intervene package for corresponding Venn diagrams in Figures 4a and Supplementary Figure 8a. **e** Table showing the total number of enriched PBRM1, SMARCA4, and CENP-B k-mers in RPE1 parental cells plus SMARCA4 in PBRM1 KO cells, in the centromere and pericentromere. **f** Table showing the % overlap of enriched k-mers in PBRM1 and SMARCA4 CUT&RUN sequencing in RPE1 parental cells (as per Supplementary Figure 7i) as well as with enriched k-mers in SMARCA4 in PBRM1 KO cells, with "All 3" referring to the overlap of peaks in all 3 datasets. Overlapping peaks were calculated using bedtools intersect package, compared to the Intervene package for the corresponding Venn diagram in Figure 4a. **g-h** Tables displaying (g) percentages and (h) numbers of enriched k-mers which could map to the indicated region of the centromere and pericentromere in each condition – PBRM1 and SMARCA4 in RPE1 parental cells (as per Figure 3i and Supplementary Figure 7h), as well as SMARCA4 in RPE1 PBRM1 knockout cells. Source data are provided as a source data file.



Figure S9

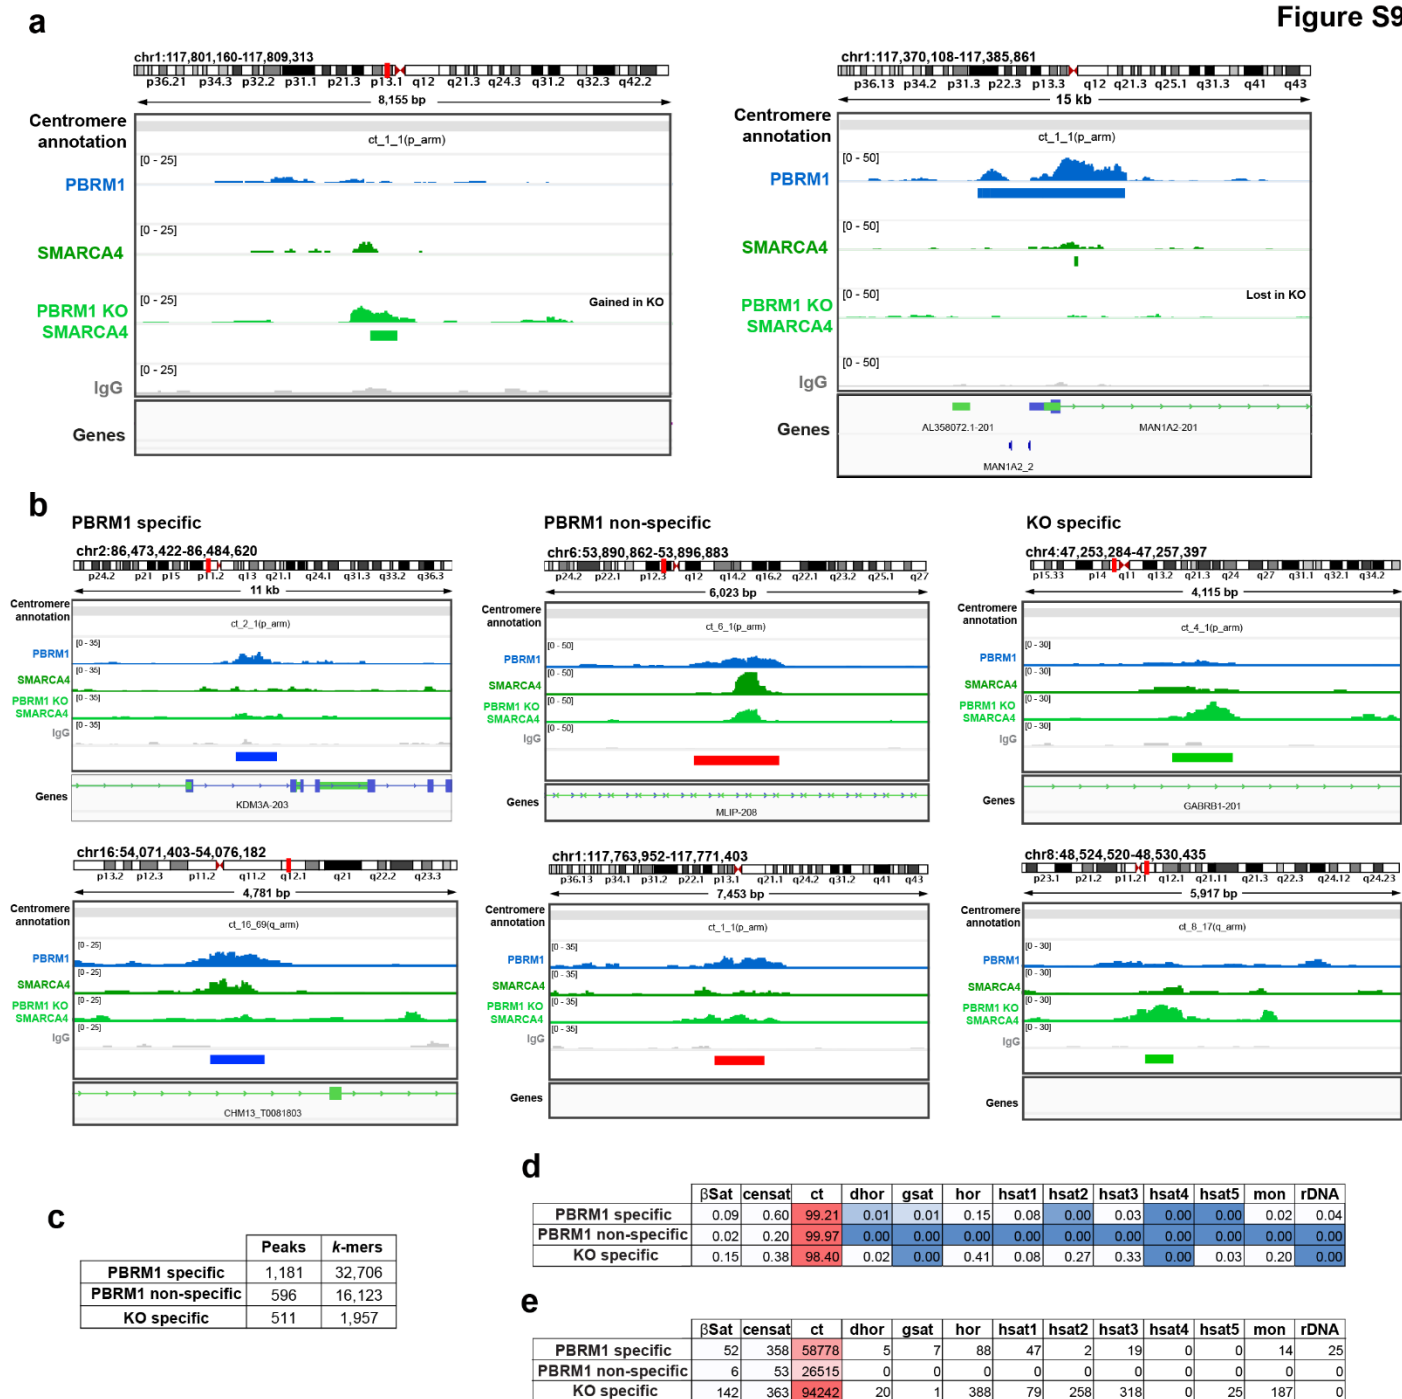

**Supplementary Figure 9. SWI/SNF binding pattern in the centromere and pericentromere changes in the absence of PBRM1 at sites of enriched histone marks in parental RPE1 cells.** **a** Additional representative genome tracks displaying coverage of reads from PBRM1 (blue), SMARCA4 (green) and IgG control (grey) CUT&RUN sequencing in RPE1 parental cells and SMARCA4 in PBRM1 knockout cells (light green), showing an example of peaks gained (left) or lost (right) in PBRM1 knockout cells. One representative independent biological replicate is shown, with boxes underneath representing peaks that were called as significantly enriched ( $q < 0.01$ ) in at least two out of the three replicates versus their IgG control. **b** Representative genome tracks displaying coverage of reads from PBRM1 (blue), SMARCA4 (green) and IgG control (grey) CUT&RUN sequencing in RPE1 parental cells and SMARCA4 in PBRM1 knockout cells (light green) that highlight the three subsets of peaks (identified as shown in Figure 4c), represented as boxes below genome tracks: PBRM1 specific (blue, left), PBRM1 non-specific (red, middle) and KO specific (green, right). For genome browser tracks (a, b), genomic location is indicated at the top, centromeric annotation is shown above the tracks and transcript annotation is shown below. **c** Table showing the total number of enriched peaks and *k*-mers from the three subsets of peaks/*k*-mers (PBRM1 specific, PBRM1 non-specific, and KO specific), in the centromere and pericentromere. Subsets of *k*-mers were identified in the same way as peaks (shown in Figure 4c). **d-e** Tables displaying (d) percentages and (e) numbers of enriched *k*-mers which could map to the indicated region of the centromere and pericentromere in each subset of *k*-mers; PBRM1 specific, PBRM1 non-specific and KO-specific.



Figure S10

a

% population overlap w/histone marks

| Peaks              | H3K4me1 | H3K4me2 | H3K4me3 | H3K9ac | H3K9me1 | H3K9me2 | H3K9me3 | H3K27ac | H3K27me3 | H3K36me1 | H3K36me2 | H3K36me3 |
|--------------------|---------|---------|---------|--------|---------|---------|---------|---------|----------|----------|----------|----------|
| PBRM1 specific     | 64.2    | 75.9    | 49.8    | 56.9   | 1.8     | 0.0     | 1.1     | 64.6    | 3.2      | 29.2     | 4.9      | 4.8      |
| PBRM1 non-specific | 95.1    | 96.1    | 43.6    | 70.2   | 4.3     | 0.0     | 0.9     | 90.3    | 0.2      | 29.2     | 9.7      | 2.8      |
| KO specific        | 83.9    | 78.6    | 20.0    | 32.9   | 1.8     | 0.0     | 0.4     | 65.7    | 0.4      | 12.5     | 7.5      | 10.4     |

| k-mers             | H3K4me1 | H3K4me2 | H3K4me3 | H3K9ac | H3K9me1 | H3K9me2 | H3K9me3 | H3K27ac | H3K27me3 | H3K36me1 | H3K36me2 | H3K36me3 |
|--------------------|---------|---------|---------|--------|---------|---------|---------|---------|----------|----------|----------|----------|
| PBRM1 specific     | 0.0     | 3.7     | 18.8    | 1.9    | 0.0     | 0.0     | 0.0     | 1.0     | 0.0      | 0.0      | 0.0      | 0.0      |
| PBRM1 non-specific | 0.0     | 3.4     | 12.4    | 0.8    | 0.0     | 0.0     | 0.0     | 7.1     | 0.0      | 0.0      | 0.0      | 0.0      |
| KO specific        | 0.0     | 0.1     | 0.6     | 0.0    | 0.0     | 0.0     | 0.2     | 0.3     | 0.0      | 0.0      | 0.0      | 0.0      |

b

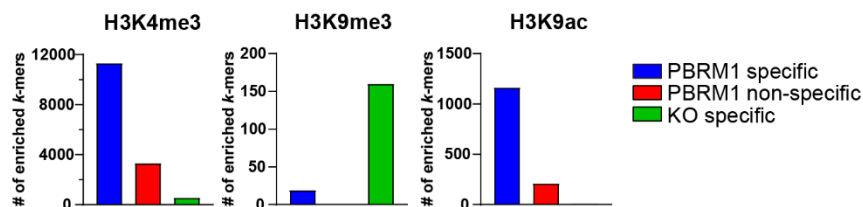

c

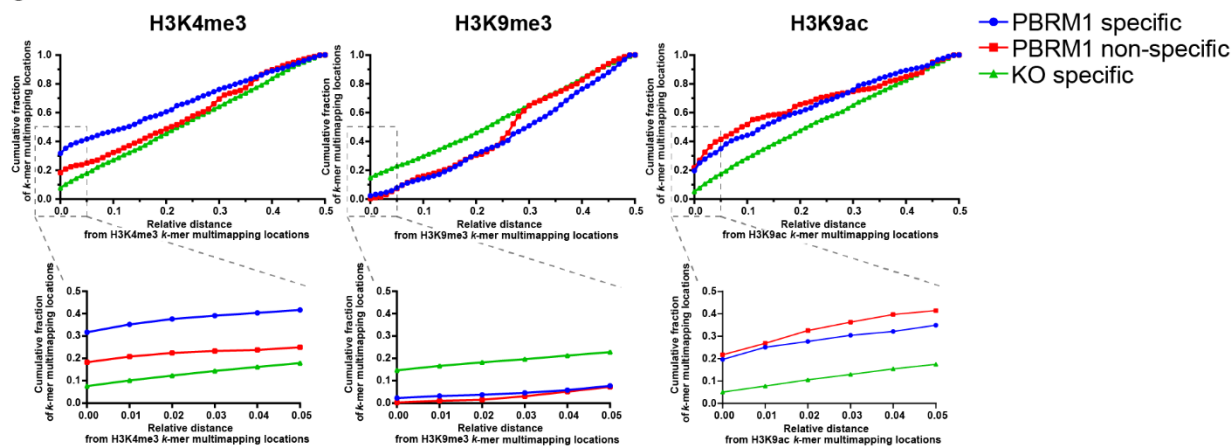

d

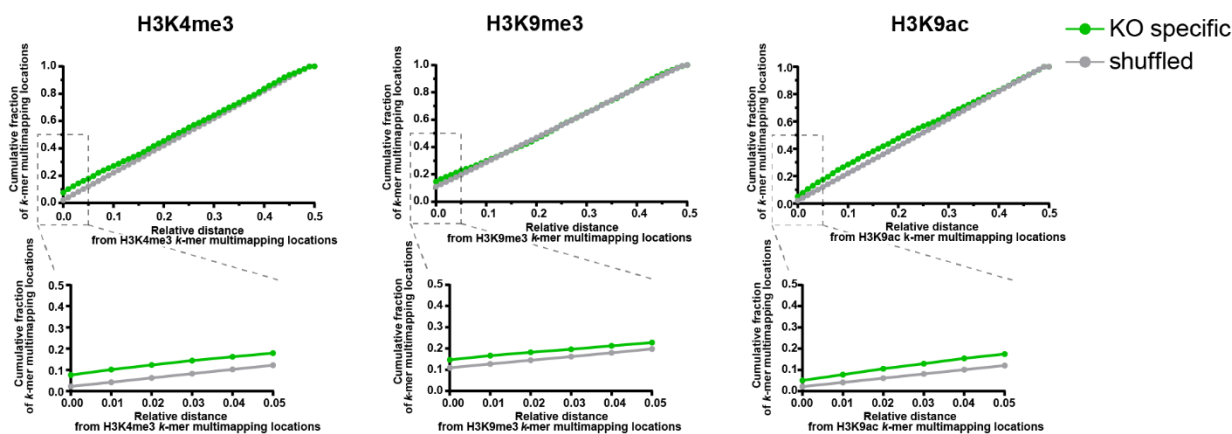



**Supplementary Figure 10. PBAF association with histone modifications is altered in PBRM1 knockouts. a**

Tables containing the percentage overlap of each subset of peaks (top) or *k*-mers (bottom) from CUT&RUN sequencing data with enriched histone mark peaks or *k*-mers from RPE1 ChIP-seq data, specifically in centromeric and pericentromeric regions. A colour scale of low (white) to high (red) is shown on each table. **b** Graphs indicating the number of *k*-mers enriched in subsets (PBRM1 specific (blue), PBRM1 non-specific (red), and KO specific (green)) overlapping with enriched H3K4me3 (left), H3K9me3 (middle), or H3K9ac (right) *k*-mers. **c** Plots displaying the cumulative fraction of reference *k*-mer multimapping locations (PBRM1 specific (blue), PBRM1 non-specific (red) and KO specific (green)) at a relative distance from query histone mark *k*-mer multimapping locations (H3K4me3, left; H3K9me3, middle; H3K9ac, right). Relative distances are calculated as the shortest distance between each *k*-mer multimapping location in the query set and the two closest *k*-mer multimapping locations in the reference set, divided by the total distance between the two closest *k*-mer multimapping locations, so the maximum relative distance is 0.5. A zoomed in view of the smallest relative distances (0 to 0.05) is shown below each plot. **d** Plots displaying the cumulative fraction of reference *k*-mer multimapping locations (KO specific (green) and as a control (grey), shuffled locations of KO specific *k*-mer multimapping locations within the centromere and pericentromere at a relative distance from query histone mark *k*-mer multimapping locations (H3K4me3, left; H3K9me3, middle; H3K9ac, right). Relative distances are calculated as the shortest distance between each *k*-mer multimapping location in the query set and the two closest *k*-mer multimapping locations in the reference set, divided by the total distance between the two closest *k*-mer multimapping locations, so the maximum relative distance is 0.5. A zoomed in view of the smallest relative distances (0 to 0.05) is shown below each plot.



Figure S11

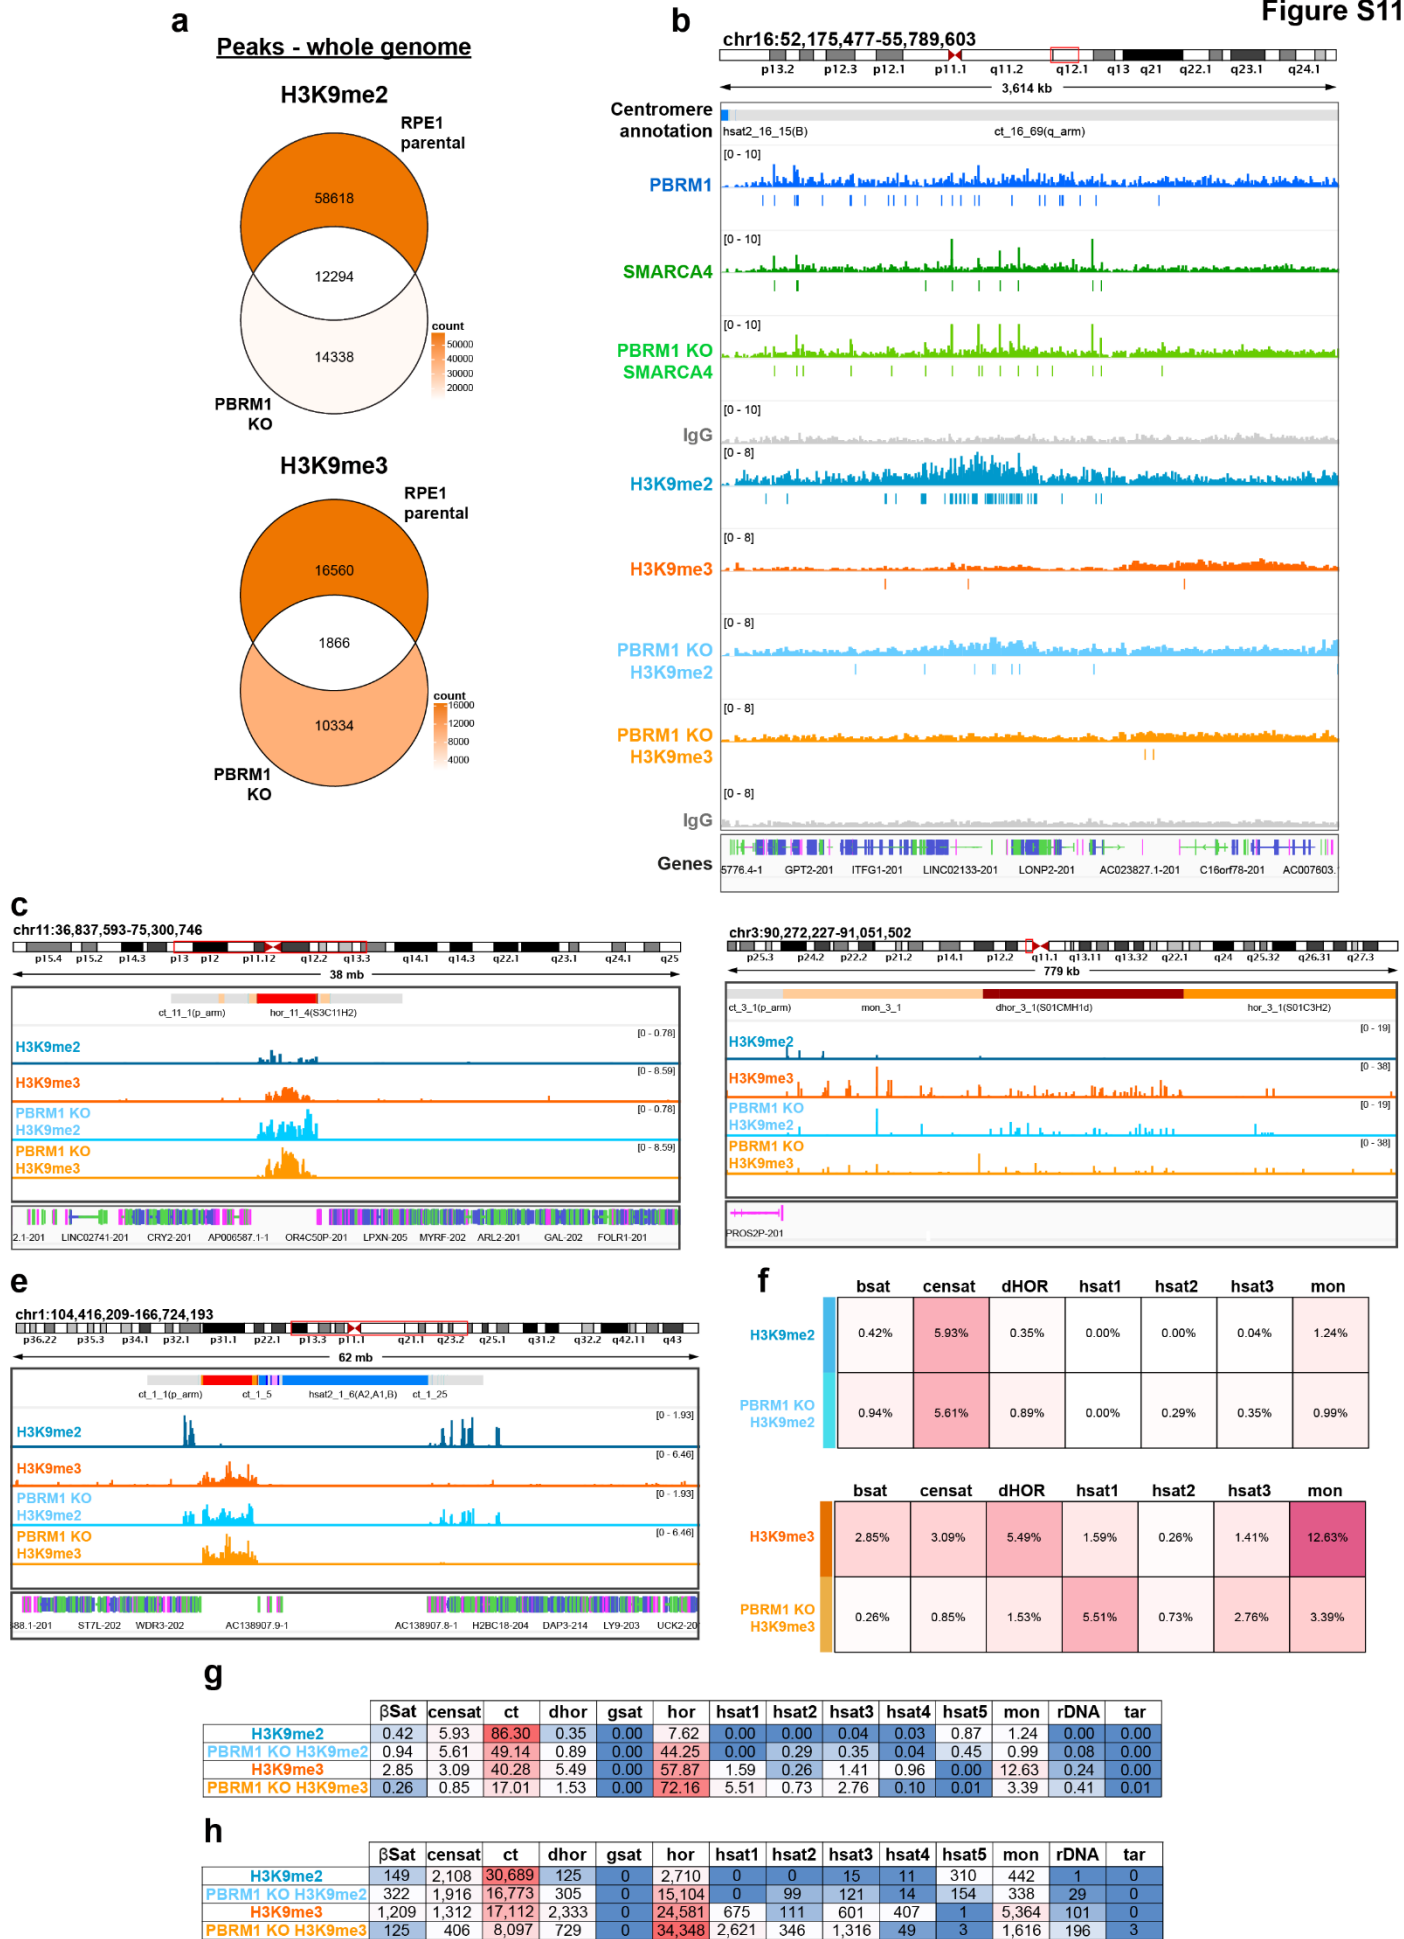



**Supplementary Figure 11. H3K9 methylation pattern is altered in PBRM1-deficient cells.** **a** Venn diagram indicating the overlap of significantly enriched peaks across the whole genome, in H3K9me2 (top) and H3K9me3 (bottom) in RPE1 parental cells and PBRM1 KO cells. Venn diagrams show enriched peaks found in at least two out of the three independent biological replicates, versus their IgG controls. The colour corresponds to the total number of enriched peaks in each region of the Venn diagram (count). **b** Additional representative genome tracks displaying coverage of reads from PBRM1 (blue), SMARCA4 (green), H3K9me2 (teal), H3K9me3 (orange) and IgG (grey) in RPE1 parental cells and SMARCA4 (light green), H3K9me2 (light blue) and H3K9me3 (light orange) in PBRM1 knockout cells. One representative independent biological replicate is shown, with boxes underneath representing peaks that were called as significantly enriched ( $q < 0.01$ ) in at least two replicates versus their IgG control. **c-e** Representative genome tracks displaying mapping locations of enriched *k*-mers across the centromere and pericentromere from analysis of H3K9me2 (teal) and H3K9me3 (orange) in RPE1 parental cells and PBRM1 knockout cells (light blue and light orange, respectively). Genome tracks show examples of altered *k*-mer enrichment in the HOR (c,e), the divergent HOR (dHOR) and monomeric repeats (mon) (d), and the transition arms (ct) (e). **f** Percentage of enriched *k*-mers that map to indicated regions of centromere and pericentromere in parental and PBRM1 knockout RPE1 cells, plotted as a heatmap, for H3K9me2 (top) and H3K9me3 (bottom). **g-h** Tables displaying (g) percentages and (h) numbers of enriched *k*-mers which could map to the indicated region of the centromere and pericentromere in each condition – H3K9me2 and H3K9me3 in RPE1 parental cells and RPE1 PBRM1 knockout cells (as per Figure 5e and Supplementary Figure 11f).



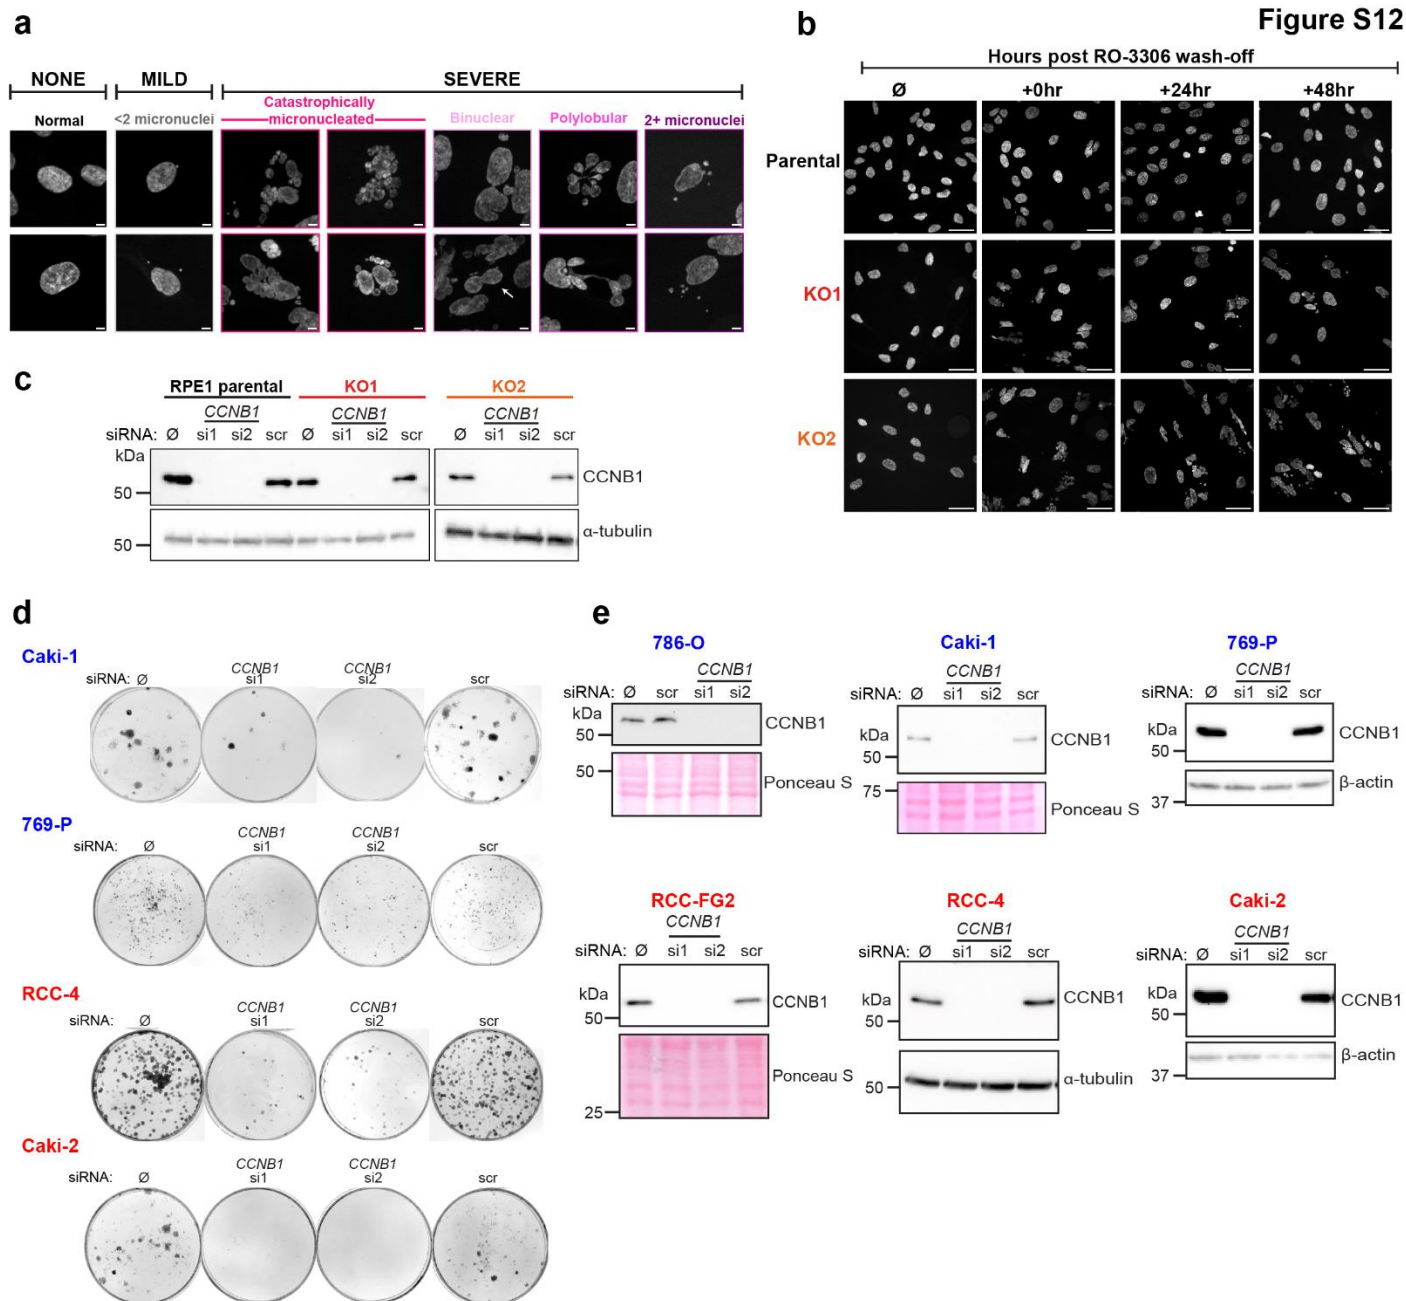

**Supplementary Figure 12. PBRM1-deficient cells are sensitive to mitotic perturbation.** **a** Representative images of nuclear defects and their associated morphological phenotypes, as quantified in Figure 6c-f. Scale bar represents 5µm. **b** Representative images from full timecourse in Figure 6f, where nuclear defects in RPE1 parental and PBRM1 knockout cells were quantified after treatment with 3µM RO-3306 for 24 hours (or treatment with DMSO alone (Ø)), and allowed to recover for 0hr, 24hr, or 48hr. Scale bars correspond to 40µm. **c** Representative western blot for CCNB1 following CCNB1 RNAi in RPE1 parental and PBRM1 knockout cells, corresponding to clonogenic survival assays in Figure 6g. **d** Representative images of colony formation following CCNB1 RNAi in a panel of PBRM1-proficient (blue) and -deficient (red) RCC cell lines, corresponding to data in Figure 6i. Representative images from 786-O and RCC-FG2 cell lines are shown in Figure 6k. **e** Representative western blots to detect CCNB1 protein expression after CCNB1 RNAi in a panel of PBRM1-proficient (blue) and -deficient (red) RCC cell lines, corresponding to data in Figure 6i. Source data are provided as a source data file.



Figure S13

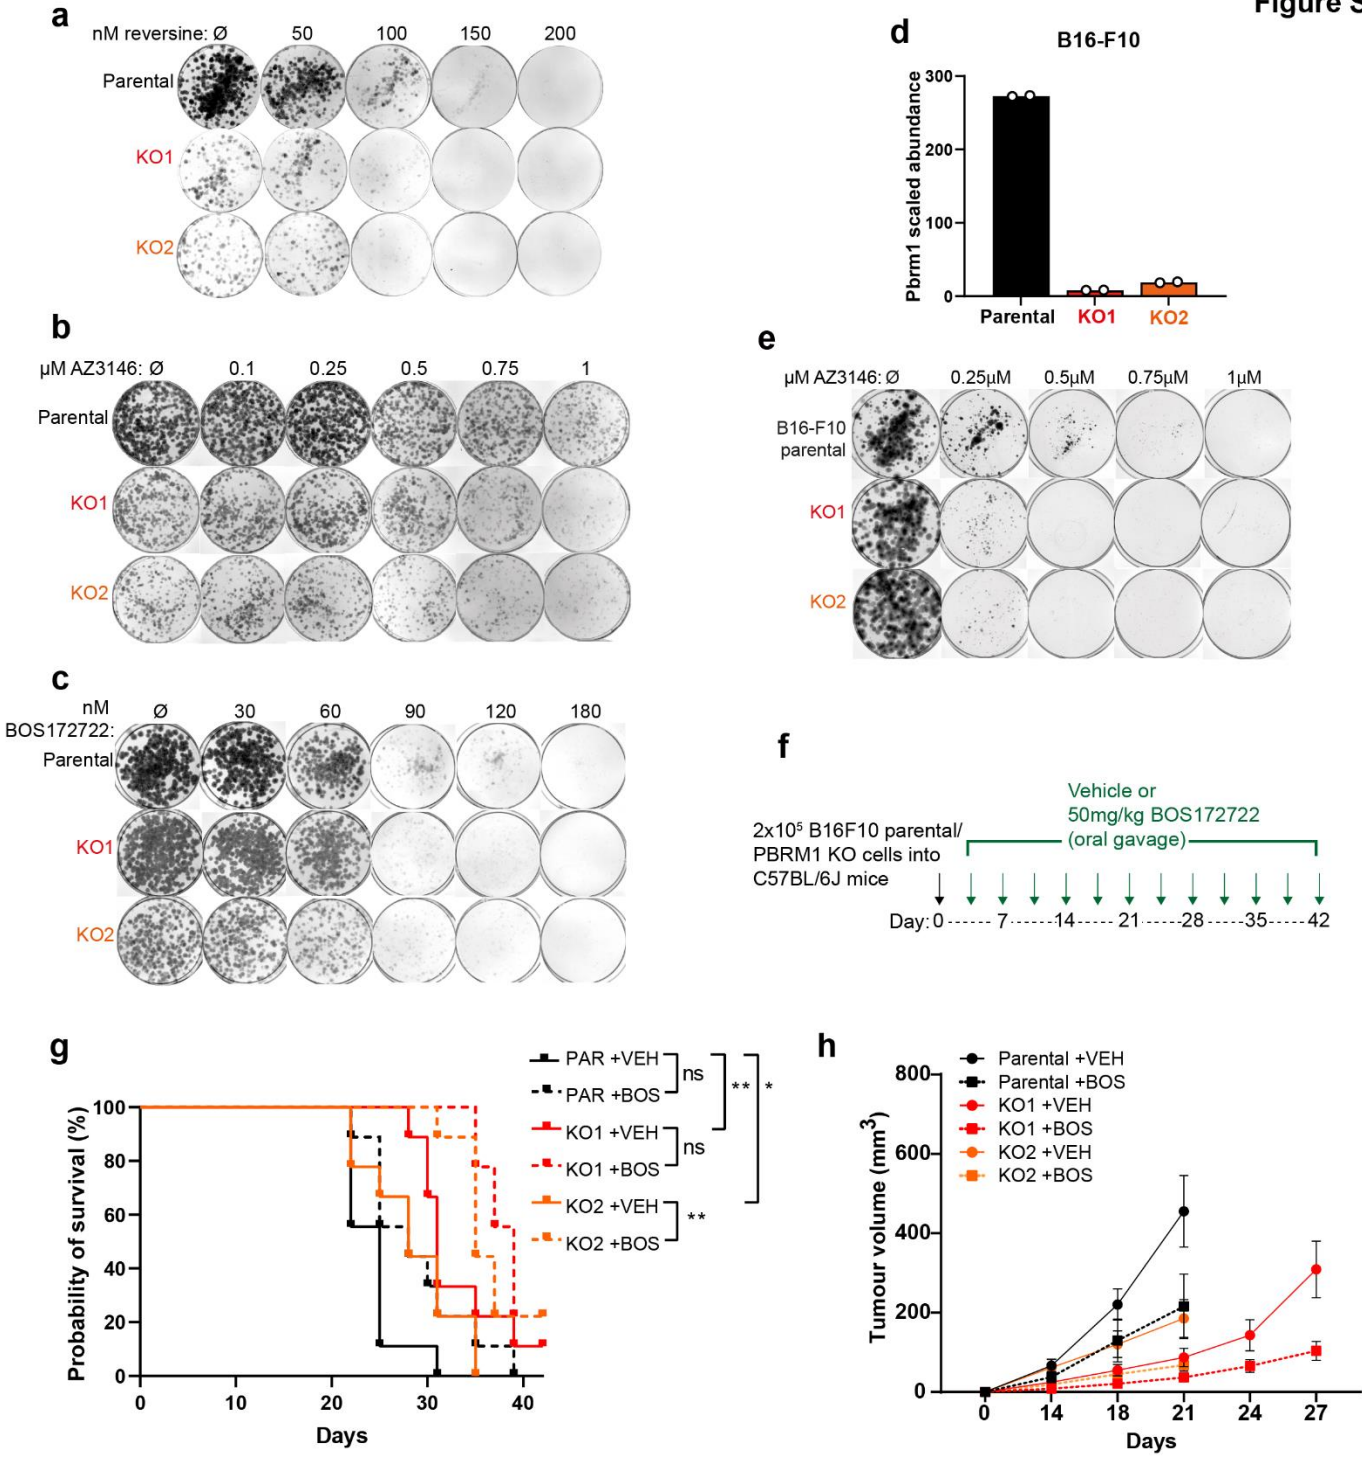



**Supplementary Figure 13. PBRM1 knockouts are sensitive to Mps1 inhibition *in vitro* and *in vivo*. a-c**

Representative images of colony formation from clonogenic survival assays in Figure 7a-c, comparing survival of RPE1 parental and PBRM1 knockout cells to doses increasing doses of Mps1 inhibitors, compared to colony formation in DMSO-only treated cells (Ø). **d** Scaled abundances of Pbrm1 following LC-MS of whole cell protein extracts of B16-F10 parental and PBRM1 knockout cells. Points correspond to two independent biological replicates. **e** Representative images of colony formation from clonogenic survival assays in Figure 7f, comparing survival of B16-F10 parental and PBRM1 knockout cells treated with increasing doses of the Mps1 inhibitor AZ3146, compared to colony formation in DMSO-only treated cells (Ø). **f** Treatment outline for *in vivo* studies. C57BL/6J mice were injected with B16-F10 parental or PBRM1 knockout cells (black arrow). After 3 days tumour growth and twice weekly after this, mice were treated with either vehicle or 50mg/kg BOS172722 and their tumour volume was measured (green arrows). **g** Combined Kaplan-Meier survival curve showing survival of mice with tumours derived from B16-F10 parental or PBRM1 knockout cells, treated with vehicle (VEH) or BOS172722 (BOS), corresponding to data from individual cell lines in Figure 7i-k.  $n=9$  mice per condition, and survival was compared using the logrank (Mantel-Cox) test. For KO2 +VEH versus KO2 +BOS,  $**p=0.0016$ ; for KO1 +VEH versus PAR +VEH,  $**p=0.0010$ ; for KO2 +VEH versus PAR +VEH,  $*p=0.0445$ . **h** Graph showing tumour volumes over indicated times of mice injected with B16-F10 parental or PBRM1 knockout cells, treated with either vehicle (VEH) or BOS172722 (BOS).  $n=9$  per condition, and graph shows data up until latest timepoint where all mice were still surviving. Tumour growth corresponds to area under the curve (A.U.C.) data from Figures 7l-n. Line indicates mean tumour volume  $\pm$  SEM. Source data are provided as a source data file.



Figure S14

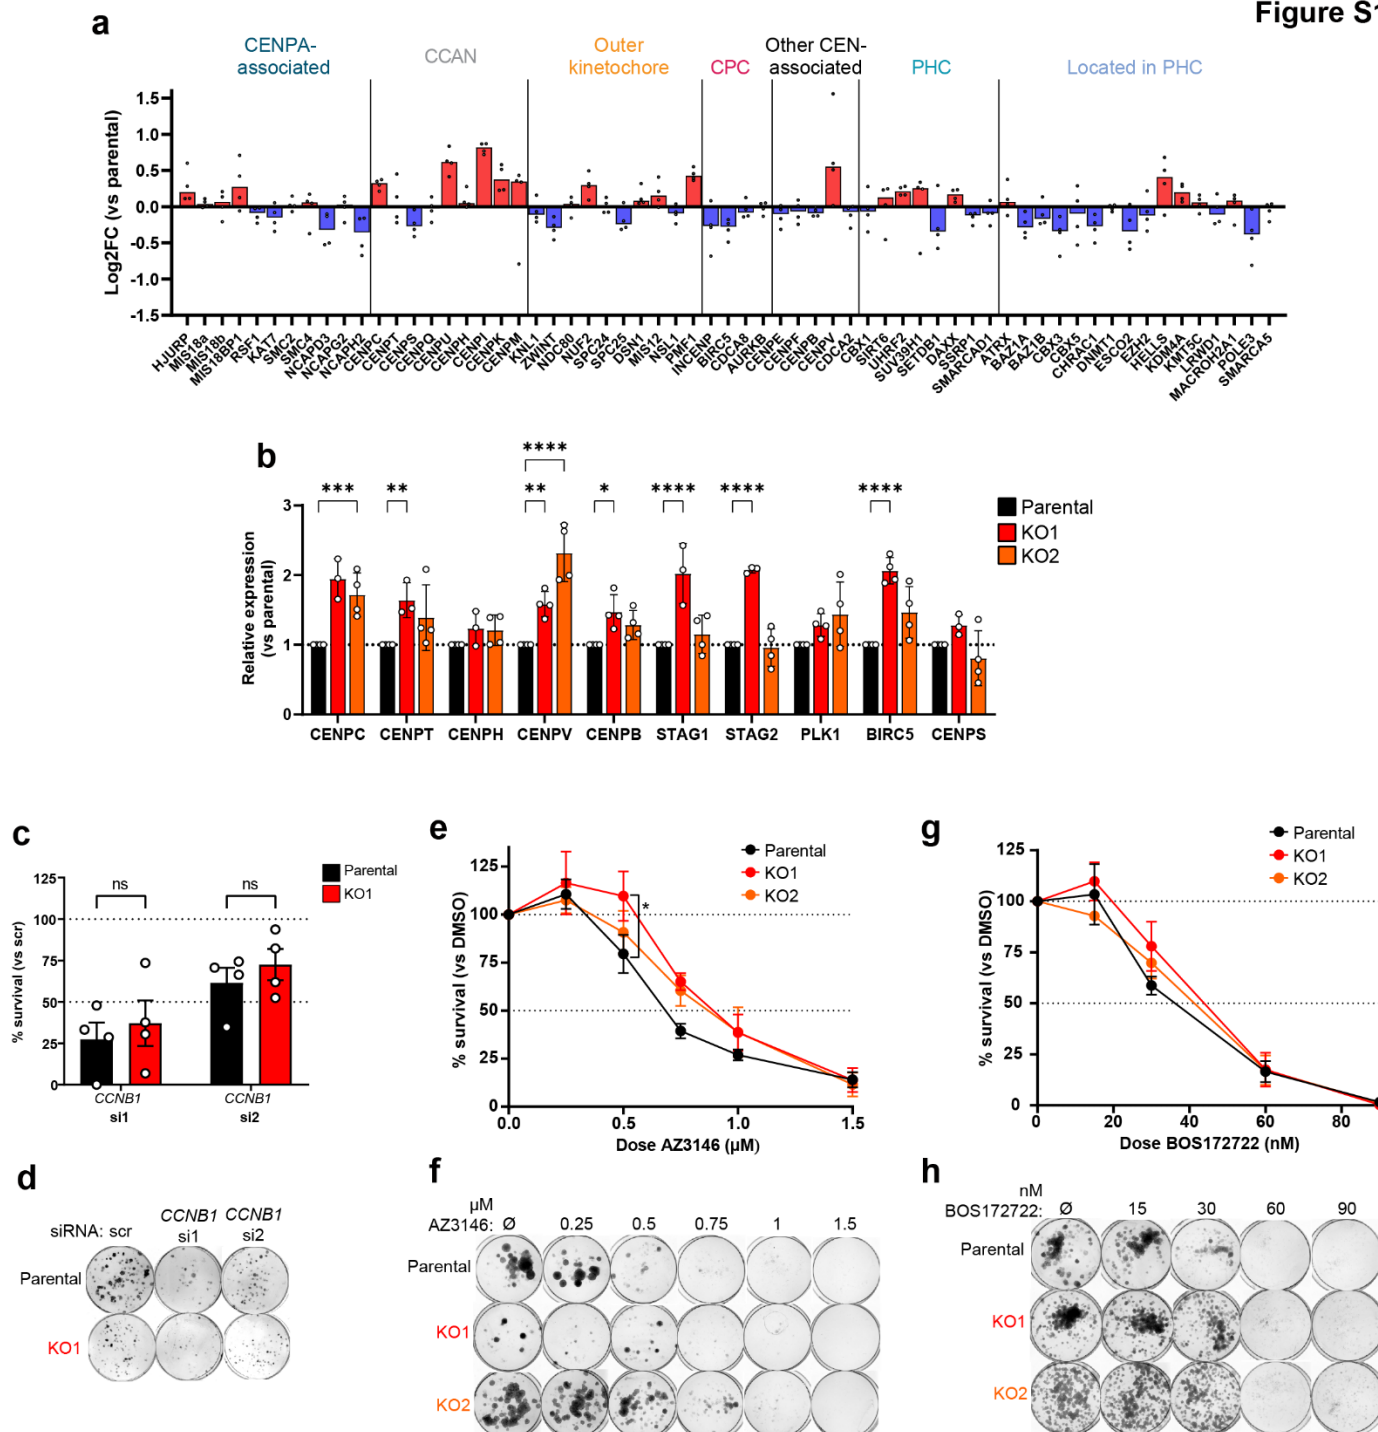

**Supplementary Figure 14. PBRM1 KOs in 786-O do not exhibit centromere phenotypes.** **a** Median Log2FC of annotated centromere and pericentromere proteins in RPE1 PBRM1 knockouts compared to parental cells. Points correspond to individual knockout clones from one of two independent biological replicates. **b** Expression levels of a panel of centromere-associated genes. RT-qPCR was used to compare transcript levels in four independent PBRM1 knockout clones in 786-O, relative to transcript levels in parental cells. *GAPDH* and *PPIA* were used for normalisation. Points correspond to independent biological replicates.  $n=4$ , mean $\pm$ SEM, and data were analysed by 2way ANOVA with Dunnett's test, \*\*\*\* $p<0.0001$ . For CENPC condition, \*\*\* $p=0.0008$ ; for CENPT, \*\* $p=0.0074$ ; for CENPV, \*\* $p=0.0086$ ; and for CENPB, \* $p=0.0466$ . **c** Clonogenic survival of 786-O parental and PBRM1 knockouts after *CCNB1* RNAi with two independent *CCNB1* siRNAs, normalised to survival after treatment with a scramble (scr) siRNA. Points correspond to independent biological replicates,  $n=4$ , mean $\pm$ SEM, and data were analysed by 2way ANOVA with Dunnett's test. **d** Representative image of colony formation from clonogenic survival assay, after treatment with the indicated siRNA as indicated in **c**. **e&g** Clonogenic survival of 786-O parental and PBRM1 knockout cells after treatment with increasing doses of the Mps1 inhibitors (e) AZ3146, and (g) BOS172722, compared to survival with treatment with DMSO alone ( $\emptyset$ ).  $n=4$ , mean $\pm$ SEM, and data were analysed by 2way ANOVA with Dunnett's test, \* $p=0.0335$ . **f&h** Representative image of colony formation from clonogenic survival assays in **e** and **g**. Source data are provided as a source data file.



Figure S15

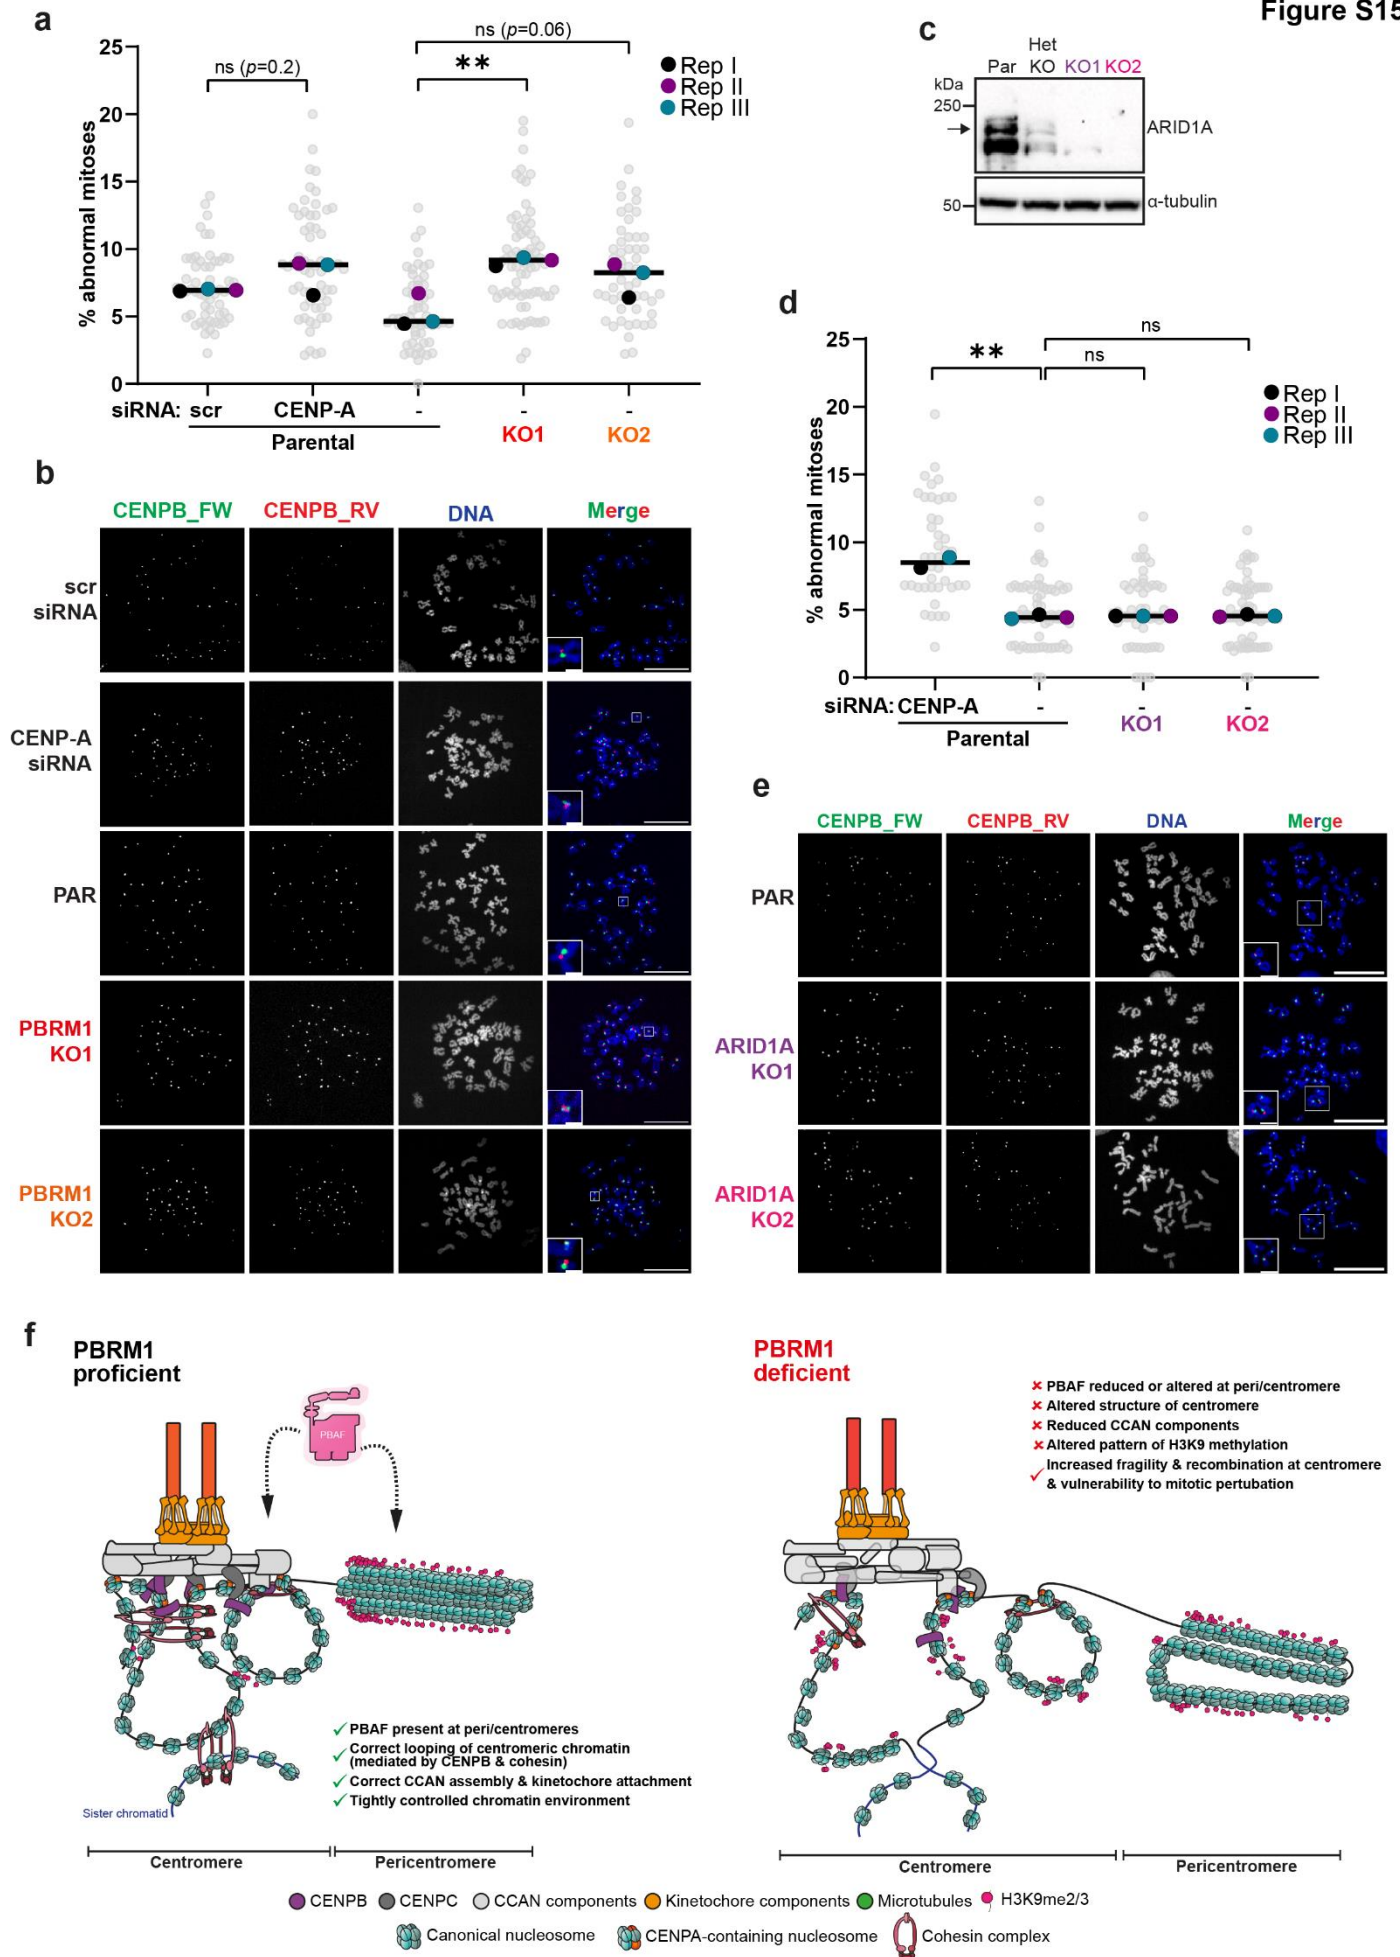



**Supplementary Figure 15. Centromere instability is conserved in other PBRM1 KOs but is not observed in ARID1A KOs.** **a** Quantification of chromatid exchanges at centromeres in 1BR3 parental or PBRM1 knockouts, or parental cells treated with CENP-A or scramble siRNAs, defined as the percentage of chromosomes with aberrant centromeres in each metaphase spread (% abnormal mitoses).  $n=3$ , grey points indicate individual metaphases, and coloured points represent the median of independent biological replicates, with line at the median of these replicates. Data were analysed using two-sided t-test,  $**p=0.0070$ . At least 50 metaphases were analysed per condition. **b** Representative metaphase spreads from Cen-CO-FISH experiments in (a), with DNA stained with DAPI (blue), and centromeres hybridised with FISH probes against CENPB-box sequences (green & red). Scale bars correspond to 20 $\mu$ m. White boxes correspond to zoomed inset images, where scale bars correspond to 5 $\mu$ m. **c** Western blot for ARID1A in RPE1 parental and ARID1A knockouts (KO1 and KO2). A third clone (Het KO) was found to have a heterozygous mutation in ARID1A alleles and was not used in this study.  $\alpha$ -tubulin is used as loading control, black arrow indicates band corresponding to ARID1A. **d** Quantification of chromatid exchanges at centromeres in RPE1 parental or ARID1A knockouts, defined as the percentage of chromosomes with aberrant centromeres in each metaphase spread (% abnormal mitoses). In two replicates, RPE1 parental cells were also treated with CENP-A siRNAs to validate the detection of chromatid exchanges.  $n=3$  for all conditions except CENP-A siRNA ( $n=2$ ), grey points indicate individual metaphases, and coloured points represent the median of independent biological replicates, with line at the median of these replicates. At least 59 metaphases were analysed per condition (>40 in CENP-A condition), and data with 3 biological replicates were analysed using two-sided t-test. **e** Representative metaphase spreads from Cen-CO-FISH experiments in (d), with DNA stained with DAPI (blue), and centromeres hybridised with FISH probes against CENP-B-box sequences (green & red). Scale bars correspond to 20 $\mu$ m. White boxes correspond to zoomed inset images, where scale bars correspond to 2 $\mu$ m. **f** Model for how PBRM1 loss affect the centromeric and pericentromeric chromatin environment. Source data are provided as a source data file.



**Table S1: oligonucleotides used in this study**

| <b>DNA primers</b> |                                   |                                |
|--------------------|-----------------------------------|--------------------------------|
| <b>Name</b>        | <b>Sequence</b>                   | <b>Application</b>             |
| PBRM1_sgRNA2_FW    | <b>CACCGT</b> CAGCGGGGACTTTGATGAT | Generation of PBRM1 knockout   |
| PBRM1_sgRNA2_RV    | <b>AAACAT</b> CATCAAAGTCCCCGCTGAC | Generation of PBRM1 knockout   |
| SMARCA4_ex2_FW1.1  | <b>ACCGT</b> GGGCGGAACTCCTCGGCC   | Generation of SMARCA4 knockout |
| SMARCA4_ex2_RV1.2  | <b>AAACG</b> GCCGAGGAGTTCCGCCAG   | Generation of SMARCA4 knockout |
| SMARCA4_ex2_FW1.3  | <b>ACCGT</b> CTGGAGTGGACATCTTCAC  | Generation of SMARCA4 knockout |
| SMARCA4_ex2_FW1.4  | <b>AAACG</b> TGAAGATGTCCACTCCAGA  | Generation of SMARCA4 knockout |
| ARID1A_sg2_FW      | <b>CACCGA</b> TGGTCATCGGGTACCGCTG | Generation of ARID1A knockout  |
| ARID1A_sg2_RV      | <b>AAACC</b> AGCGGTACCCGATGACCATC | Generation of ARID1A knockout  |
| CENPC_qPCR_FW      | AGGAAGGCCATCAGGAGGAT              | RT-qPCR                        |
| CENPC_qPCR_RV      | GGGTCCTTTACCCTCGTTGG              | RT-qPCR                        |
| CENPT_qPCR_FW      | CCACGGAAGACTCAGAAACCA             | RT-qPCR                        |
| CENPT_qPCR_RV      | AGTCTTGGCTTCTTCATCATATTCT         | RT-qPCR                        |
| CENPH_qPCR_FW      | AGGCTGAGAGCACAGACAAAA             | RT-qPCR                        |
| CENPH_qPCR_RV      | GCAGTTGAAAGTCTCATCCTGTC           | RT-qPCR                        |
| CENPV_qPCR_FW      | GGGAGCTGAGCACATAACGA              | RT-qPCR                        |
| CENPV_qPCR_RV      | GGGGCAATTCCGAAGCCT                | RT-qPCR                        |
| CENPB_qPCR_FW      | ACCTAGATTGGCAGCACCAC              | RT-qPCR                        |
| CENPB_qPCR_RV      | GGCCAAATGGGGAGGAAAGA              | RT-qPCR                        |
| STAG1_qPCR_FW      | ATTGGCGTGTGGAAAATGCC              | RT-qPCR                        |
| STAG1_qPCR_RV      | CCTCAAAGGCAATCCTCAGC              | RT-qPCR                        |
| STAG2_qPCR_FW      | GACCGCCACTTTCAAACCC               | RT-qPCR                        |
| STAG2_qPCR_RV      | GTGGCCACCTCCCCC                   | RT-qPCR                        |
| PLK1_qPCR_FW       | CCGCAATTACATGAGCGAGC              | RT-qPCR                        |
| PLK1_qPCR_RV       | TGAGCTTGGTGTGATCCTGG              | RT-qPCR                        |
| BIRC5_qPCR_FW      | CCGCAATTACATGAGCGAGC              | RT-qPCR                        |
| BIRC5_qPCR_RV      | TGAGCTTGGTGTGATCCTGG              | RT-qPCR                        |
| CENPS_qPCR_FW      | CCAGGAGGAGTAATTCAGTGCTAAA         | RT-qPCR                        |
| CENPS_qPCR_RV      | GCCATATGCATTTCTAGGTGGC            | RT-qPCR                        |
| GAPDH_qPCR_FW      | ATTCCACCCATGGCAAATTC              | RT-qPCR                        |
| GAPDH_qPCR_RV      | TCTCGCTCCTGGAAGATGGT              | RT-qPCR                        |
| PPIA_qPCR_FW       | AGGGTTCCTGCTTTCACAGA              | RT-qPCR                        |
| PPIA_qPCR_RV       | CTTGCCACCAGTGCCATTAT              | RT-qPCR                        |



**Table S2: antibodies used in this study**

| <b>Primary antibodies</b> |               |                |                     |                    |                 |
|---------------------------|---------------|----------------|---------------------|--------------------|-----------------|
| <b>Target</b>             | <b>Source</b> | <b>Product</b> | <b>Host species</b> | <b>Application</b> | <b>Dilution</b> |
| PBRM1                     | Novus         | NBP2-76400     | Rabbit              | WB                 | 1:1000          |
|                           | Active Motif  | AB_279361      | Rabbit              | IF                 | 1:100           |
| H3K9me3                   | Abcam         | ab-176916      | Rabbit              | CUT&RUN            | 1:50            |
|                           |               |                |                     | IF                 | 1:2000          |
| NDC80                     | Abcam         | ab3613         | Mouse               | CUT&RUN            | 1:50            |
| CCNB1                     | Abcam         | ab3613         | Mouse               | IF                 | 1:1000          |
| ARID1A                    | Santa Cruz    | sc-245         | Mouse               | WB                 | 1:200           |
| SMARCA4                   | CST           | 12354          | Rabbit              | WB                 | 1:1000          |
|                           | Santa Cruz    | sc-17796       | Mouse               | WB                 | 1:2000          |
| H3K9me2                   | Abcam         | ab110641       | Rabbit              | CUT&RUN            | 1:25            |
|                           | Millipore     | 05-1249        | Mouse               | CUT&RUN            | 1:50            |
| CENP-B                    | Abcam         | ab25734        | Rabbit              | CUT&RUN            | 1:50            |
|                           |               |                |                     | IF                 | 1:500           |
| CENP-A                    | Abcam         | ab-13939       | Mouse               | WB                 | 1:1000          |
|                           | Invitrogen    | MA1-20832      | Mouse               | IF                 | 1:1000          |
| IgG isotype control       | CST           | 66362          | Rabbit              | CUT&RUN            | 1:20            |
| $\alpha$ -tubulin         | Abcam         | ab-7291        | Mouse               | WB                 | 1:10000         |
|                           |               |                |                     | IF                 | 1:10000         |
| $\beta$ -actin-HRP        | Sigma         | A3854          | Mouse               | WB                 | 1:40000         |

| <b>Secondary antibodies</b> |               |                     |                     |                    |                 |
|-----------------------------|---------------|---------------------|---------------------|--------------------|-----------------|
| <b>Target</b>               | <b>Source</b> | <b>Product code</b> | <b>Host species</b> | <b>Application</b> | <b>Dilution</b> |
| Anti-mouse HRP              | Agilent Dako  | P0260               | Rabbit              | WB                 | 1:10000         |
| Anti-rabbit HRP             | Agilent Dako  | P0448               | Goat                | WB                 | 1:10000         |
| Anti-mouse Alexa Fluor 488  | Invitrogen    | A-11029             | Goat                | IF                 | 1:500           |
| Anti-rabbit Alexa Fluor 488 | Invitrogen    | A-21206             | Donkey              | IF                 | 1:500           |
| Anti-mouse Alexa Fluor 555  | Invitrogen    | A-21422             | Goat                | IF                 | 1:500           |
| Anti-rabbit Alexa Fluor 555 | Invitrogen    | A-31572             | Donkey              | IF                 | 1:500           |
| Anti-mouse Alexa Fluor 647  | Invitrogen    | A-21235             | Goat                | IF                 | 1:500           |
